# Supplementary material for: Genome-Wide Identification, Evolution, and Comparative Analysis of B-Box Genes in Brassica rapa, B. oleracea, and B. napus and Their Expression Profiling in B. rapa in Response to Multiple Hormones and Abiotic Stresses
Source: MDPI journal article supplement (doi:10.3390/ijms221910367), 2021-09-26
Supplement: s1 [file s1]

|         | 10    | 20    | 30   | 40   | 50   | 60   | 70    | 80   |     |      |     |    |    |    |    |    |    |    |    |
|---------|-------|-------|------|------|------|------|-------|------|-----|------|-----|----|----|----|----|----|----|----|----|
| BrBBX8  | ----- | VCNT  | CRSA | ACTV | YCR  | ADSA | YLCAT | CD   | AQV | HA   | AN  | LL | AS | RH | ER | VR | VR | 44 |    |
| BrBBX49 | ----- | QTCD  | ICRS | AACT | VYCR | PD   | SA    | YLC  | TSC | DAQ  | I   | HE | AN | RL | AS | RH | ER | 45 |    |
| BrBBX7  | ----- | TRAC  | DI   | CRSA | ACTI | YRE  | AD    | STYL | CTT | CD   | AR  | V  | HA | AA | KR | VR |    | 38 |    |
| BrBBX50 | ----- | ENNT  | GPRA | CDT  | ICG  | STI  | CTV   | YCH  | ADS | AYLC | NS  | CD | AQ | VH |    |    |    | 37 |    |
| BrBBX26 | ----- | LCDS  | CKS  | SATA | AALY | CRP  | DA    | AF   | LC  | LS   | CD  | SK | V  | HA | AN | KL | AS | 44 |    |
| BrBBX42 | ----- | LCDS  | CKS  | SATA | AALY | CRP  | DA    | AF   | LC  | LS   | CD  | SK | V  | HA | AN | KL | AS | 44 |    |
| BrBBX19 | ----- | MASRP | CD   | SCRS | AAAT | LF   | CR    | ADA  | AF  | LC   | GE  | CD | GK | I  | H  | I  | AN | 48 |    |
| BrBBX10 | ----- | AAARS | CD   | ACK  | SASA | AVY  | CR    | FD   | SA  | FL   | CIT | CD | TS | I  | H  | S  | FT | 42 |    |
| BrBBX29 | ----- | PCE   | FC   | GERA | AV   | LF   | CR    | AD   | TAK | L    | CL  | P  | CD | Q  | H  | V  | H  | 44 |    |
| BrBBX51 | ----- | VP    | CD   | FC   | GERT | AV   | LF    | CR   | AD  | TAK  | L   | CL | P  | CD | H  | H  | V  | 45 |    |
| BrBBX39 | ----- | VP    | CD   | FC   | NERA | AV   | LF    | CR   | AD  | A    | AK  | L  | CL | P  | CD | R  | H  | 45 |    |
| BrBBX21 | ----- | CDY   | CESS | VAL  | VY   | CK   | AD    | SA   | KL  | CL   | AC  | DN | Q  | V  | H  | V  | T  | 43 |    |
| BrBBX6  | ----- | MC    | D    | FC   | G    | E    | Q     | R    | S   | M    | VY  | CR | S  | D  | A  | A  | C  | 44 |    |
| BrBBX25 | ----- | MC    | D    | FC   | G    | E    | Q     | R    | S   | M    | VY  | CR | S  | D  | A  | A  | C  | 44 |    |
| BrBBX17 | ----- | MC    | D    | FC   | G    | D    | Q     | R    | S   | M    | VY  | CR | S  | D  | S  | A  | C  | 44 |    |
| BrBBX15 | ----- |       |      |      |      |      |       |      |     |      |     |    |    |    |    |    |    | 43 |    |
| BrBBX27 | ----- |       |      |      |      |      |       |      |     |      |     |    |    |    |    |    |    | 33 |    |
| BrBBX5  | ----- | EPK   | CDY  | CATT | QAI  | I    | Y     | CKY  | D   | L    | A   | K  | L  | CL | K  | D  | V  | 46 |    |
| BrBBX48 | ----- | PM    | CD   | H    | C    | N    | M     | G    | K   | A    | V   | Y  | CK | T  | H  | L  | A  | R  | 46 |
| BrBBX12 | ----- | RACD  | S    | CL   | K    | R    | R     | A    | R   | WY   | CA  | AD | A  | F  | L  | C  | H  | S  | 45 |
| BrBBX33 | ----- | RACD  | S    | CV   | K    | R    | R     | A    | R   | WY   | CA  | AD | A  | F  | L  | C  | H  | S  | 45 |
| BrBBX30 | ----- | RACD  | S    | CV   | K    | R    | R     | A    | R   | WY   | CA  | AD | A  | F  | L  | C  | H  | S  | 45 |
| BrBBX43 | ----- | RACD  | S    | CV   | K    | R    | R     | A    | R   | WY   | CA  | AD | A  | F  | L  | C  | H  | S  | 45 |
| BrBBX40 | ----- | RT    | CD   | N    | CL   | K    | K     | Q    | A   | H    | W   | F  | CA | A  | D  | E  | A  | F  | 45 |
| BrBBX23 | ----- | CEL   | CL   | N    | K    | H    | A     | V    | WY  | CA   | S   | D  | A  | F  | L  | C  | H  | V  | 43 |
| BrBBX14 | ----- | CN    | V    | C    | E    | A    | A     | E    | A   | V    | L   | C  | C  | A  | D  | E  | A  | A  | 43 |
| BrBBX35 | ----- | Q     | C    | N    | V    | C    | E     | A    | A   | E    | A   | V  | L  | C  | C  | A  | D  | E  | 44 |
| BrBBX31 | ----- | CN    | V    | C    | E    | T    | A     | E    | A   | V    | L   | C  | C  | A  | D  | E  | A  | A  | 43 |
| BrBBX28 | ----- | L     | C    | D    | A    | C    | E     | N    | A   | A    | I   | V  | F  | CA | A  | D  | E  | A  | 42 |
| BrBBX38 | ----- | L     | C    | D    | A    | C    | E     | N    | A   | A    | I   | V  | F  | CA | A  | D  | E  | A  | 42 |
| BrBBX44 | ----- | L     | C    | D    | A    | C    | E     | S    | A   | A    | I   | V  | F  | CA | A  | D  | E  | A  | 42 |
| BrBBX1  | ----- | W     | C    | D    | V    | C    | D     | K    | E   | E    | A   | S  | V  | F  | C  | C  | A  | D  | 44 |
| BrBBX37 | ----- | W     | C    | D    | V    | C    | D     | K    | E   | E    | A   | S  | V  | F  | C  | C  | A  | D  | 44 |
| BrBBX13 | ----- | R     | C    | D    | V    | C    | D     | K    | E   | E    | A   | L  | V  | F  | C  | T  | A  | D  | 30 |
| BrBBX32 | ----- | R     | C    | D    | V    | C    | D     | K    | E   | E    | A   | S  | V  | F  | C  | T  | A  | D  | 44 |
| BrBBX34 | ----- | R     | C    | D    | V    | C    | D     | K    | E   | E    | A   | S  | V  | F  | C  | T  | A  | D  | 44 |
| BrBBX41 | ----- | C     | D    | V    | C    | E    | K     | A    | P   | A    | T   | V  | I  | C  | C  | A  | D  | E  | 40 |
| BrBBX46 | ----- | C     | D    | V    | C    | E    | N     | A    | P   | A    | T   | V  | I  | C  | C  | A  | D  | E  | 40 |
| BrBBX45 | ----- | C     | D    | V    | C    | E    | N     | A    | P   | A    | T   | V  | I  | C  | C  | A  | D  | E  | 40 |
| BrBBX20 | ----- | C     | D    | V    | C    | E    | K     | A    | P   | A    | T   | L  | I  | C  | C  | A  | D  | E  | 43 |
| BrBBX22 | ----- | C     | D    | V    | C    | E    | K     | A    | P   | A    | T   | L  | I  | C  | C  | A  | D  | E  | 43 |
| BrBBX16 | ----- | Q     | E    | K    | A    | A    | F     | I    | F   | C    | V   | E  | D  | R  | A  | L  | L  | C  | 26 |
| BrBBX18 | ----- | M     | G    | K    | K    | C    | D     | L    | C   | D    | G   | -  | V  | A  | R  | M  | Y  | C  | 47 |
| BrBBX36 | ----- | M     | G    | K    | K    | C    | D     | L    | C   | D    | G   | -  | V  | A  | R  | M  | Y  | C  | 47 |
| BrBBX2  | ----- | K     | C    | D    | L    | C    | E     | G    | -   | V    | A   | R  | M  | Y  | C  | E  | S  | D  | 43 |
| BrBBX11 | ----- | M     | E    | K    | M    | K    | C     | E    | L   | C    | E   | G  | -  | V  | A  | R  | M  | Y  | 47 |
| BrBBX47 | ----- | C     | E    | L    | C    | D    | G     | -    | V   | A    | R   | M  | Y  | C  | E  | S  | D  | Q  | 42 |
| BrBBX4  | ----- | P     | V    | R    | C    | E    | L     | C    | G   | -    | D   | A  | S  | V  | F  | C  | E  | A  | 31 |
| BrBBX9  | ----- | P     | V    | R    | C    | E    | L     | C    | G   | -    | D   | A  | S  | V  | F  | C  | E  | A  | 31 |
| BrBBX3  | ----- | V     | S    | C    | D    | L    | C     | G    | -   | N    | A   | A  | V  | Y  | C  | E  | A  | D  | 34 |
| BrBBX24 | ----- | V     | K    | S    | C    | E    | L     | C    | G   | -    | A   | E  | A  | D  | L  | H  | C  | A  | 33 |
| BoBBX1  | ----- | W     | C    | D    | V    | C    | D     | K    | E   | E    | A   | S  | V  | F  | C  | C  | A  | D  | 44 |
| BoBBX19 | ----- | W     | C    | D    | V    | C    | D     | K    | E   | E    | A   | S  | V  | F  | C  | C  | A  | D  | 43 |
| BoBBX11 | ----- | R     | C    | D    | V    | C    | D     | K    | E   | E    | A   | S  | V  | F  | C  | T  | A  | D  | 44 |
| BoBBX29 | ----- | R     | C    | D    | V    | C    | D     | K    | E   | E    | A   | S  | V  | F  | C  | T  | A  | D  | 44 |
| BoBBX32 | ----- | R     | C    | D    | V    | C    | D     | K    | E   | E    | A   | S  | V  | F  | C  | T  | A  | D  | 44 |
| BoBBX12 | ----- | CN    | V    | C    | E    | A    | A     | E    | A   | V    | L   | C  | C  | A  | D  | E  | A  | A  | 43 |
| BoBBX33 | ----- | CN    | V    | C    | E    | A    | A     | E    | A   | V    | L   | C  | C  | A  | D  | E  | A  | A  | 43 |
| BoBBX28 | ----- | Q     | C    | N    | V    | C    | E     | T    | A   | E    | A   | V  | L  | C  | C  | A  | D  | E  | 44 |
| BoBBX47 | ----- | I     | Q    | C    | E    | V    | C     | E    | K   | A    | E   | A  | E  | V  | L  | C  | C  | S  | 45 |
| BoBBX41 | ----- | Q     | C    | D    | V    | C    | E     | K    | A   | P    | A   | T  | V  | I  | C  | C  | A  | D  | 42 |
| BoBBX44 | ----- | C     | D    | V    | C    | E    | N     | A    | P   | A    | T   | V  | I  | C  | C  | A  | D  | E  | 40 |
| BoBBX21 | ----- | C     | D    | V    | C    | E    | K     | A    | P   | A    | T   | L  | I  | C  | C  | A  | D  | E  | 43 |
| BoBBX18 | ----- | L     | C    | D    | A    | C    | E     | N    | A   | A    | I   | V  | F  | CA | A  | D  | E  | A  | 40 |
| BoBBX40 | ----- | L     | C    | D    | A    | C    | E     | N    | A   | A    | I   | V  | F  | CA | A  | D  | E  | A  | 42 |
| BoBBX43 | ----- | L     | C    | D    | A    | C    | E     | S    | A   | A    | I   | V  | F  | CA | A  | D  | E  | A  | 42 |
| BoBBX31 | ----- | M     | E    | R    | L    | C    | E     | V    | K   | A    | Y   | R  | A  | V  | Y  | C  | I  | A  | 47 |
| BoBBX7  | ----- | C     | N    | T    | C    | R    | S     | A    | A   | C    | T   | VY | CR | AD | S  | AY | L  | C  | 43 |
| BoBBX50 | ----- | C     | D    | I    | C    | R    | S     | A    | A   | C    | T   | VY | CR | AD | S  | AY | L  | C  | 43 |
| BoBBX6  | ----- | R     | A    | C    | D    | I    | C     | R    | S   | A    | A   | C  | T  | VY | CR | AD | S  | AY | 37 |

|          |                                                                           |    |
|----------|---------------------------------------------------------------------------|----|
| BoBBX51  | -----PACDTCGSTICTVYCHADSAYLNCNSCDAQVHSANRV-ASRHKRVRV-----                 | 45 |
| BoBBX8   | -----HSFT-----RHERV-----                                                  | 9  |
| BoBBX49  | -----RFCDACQSVSAAVFCRVDSAFLCLTCDTRIHSYT-----RHERVFL-----                  | 41 |
| BoBBX38  | -----LCDSCKSATAALYCRPDAAFLCLSCDSKVHAANKL-ASR HARVWM-----                  | 44 |
| BoBBX46  | -----LCDSCKSATAALYCRPDAAFLCLSCDSKVHAANKL-ASR HARVWM-----                  | 44 |
| BoBBX22  | -----MASRPCDSCRSAATLILCRADAAFLCGECDGKTHSANKL-ASRHERVWL-----               | 48 |
| BoBBX10  | -----RACDSCCLKRRARWFCAADDAFLCHSCDGSVHSANPL-ARRHERVLL-----                 | 45 |
| BoBBX30  | -----RACDNCVKKRARWYCAADDAFLCHFCDGGSVHSANPL-ACRHERVRL-----                 | 45 |
| BoBBX35  | -----RACDSCVKRRARWYCAADDAFLCQSCDTLVHSANLL-ARRHERVLL-----                  | 45 |
| BoBBX36  | -----RACDSCVKRRARWYCAADDAFLCQSCDTLVHSANLL-ARRHERVLL-----                  | 45 |
| BoBBX23  | -----RACDSCVKKRARWYCAADDAFLCQSCDTLVHSANPL-ARRHERVRL-----                  | 45 |
| BoBBX16  | -----RTCDNCFKKRAHWFCAADEAFLLCQSCDTSVHSANLL-ARRHERVRL-----                 | 45 |
| BoBBX24  | -----PERQEDVKRPRDCEILCLNKHAVWYCASDDAFLCHVCDSESVHRANQV-ATKHDRVCL-----      | 55 |
| BoBBX4   | -----EPKCDYCATTTQAIITYCKYDLAKLCLKCDVHVHSPNPL-SRRHMRSLI-----               | 46 |
| BoBBX45  | -----PMCDHCNMGKAVVYCKTHLARICSQCDRKH HHYVTMDSPDHSRLLL-----                 | 46 |
| BoBBX5   | -----MCDFCGEQSRSMVYCRSDDACLCLSCDRSIHSANAL-SKRHSRTLIV-----                 | 44 |
| BoBBX27  | -----MCDFCGEQSRSMVYCRSDAACLCLSCDRSVHSANAL-SKRHSRTLIV-----                 | 44 |
| BoBBX14  | -----MCDFCGEQSRSMVYCRSDSACLCLSCDRSVHSANAL-SKRHSRTLIV-----                 | 44 |
| BoBBX13  | -----ICDFCNEQSRSMVYCRSDAACLCLSCDRNVHSANAL-SKRHSRTLIV-----                 | 44 |
| BoBBX17  | -----ERVPCDFCNERAAVLFCRADAAKLCLPCDRHVHTANLL-SKKHVRSQI-----                | 47 |
| BoBBX34  | -----PCDFCGERA AVLFCRADTAKLCLPCDQQVHTANLL-SKKHVRSQI-----                  | 44 |
| BoBBX52  | -----PCDFCGERTAFLLFCRADAAKLCLPCDHRVHKANLL-SRKHVRSRI-----                  | 44 |
| BoBBX20  | -----CDYCESSVALVYCKADSAKLCLACDNQVHVTINQL-FSKHFRSLI-----                   | 43 |
| BoBBX2   | -----KCDLDCG-VARMYCESDQASLCWNCDAKVHGANFL-VAKHTRCLL-----                   | 43 |
| BoBBX39  | -----KCDLCEG-VARMYCESDQASLCWDCDGKVHGANFL-VAKHTRCLL-----                   | 43 |
| BoBBX42  | -----MGKKKCALDCG-VARMYCESDQASLCWNCDGKVHGANFL-VAKHTRCLL-----               | 47 |
| BoBBX9   | -----MEKMKCEILCEG-VARMFCESDQASLCWDCDGNVHGANFL-VAKHARCLL-----              | 47 |
| BoBBX48  | -----MAKKKCEILCDR-VARTFCESDQASLCWDCGKVHGANFL-VAKHTRCLL-----               | 47 |
| BoBBX3   | -----PVRCEILCGG-DASVFCEADTAFLLCRKCDRWVH-----                              | 31 |
| BoBBX25  | -----ASVFCEADSAFLCRKCDRWVH-----                                           | 21 |
| BoBBX15  | -----ICEILCG-AEAHLHCDADSAYLRCSDVKFHASNFL-FSRHVRR-----                     | 41 |
| BoBBX26  | -----VKSCEILCG-AEADLHCAADS AFLCRSCDAKFHASNILL-FSRHVVRTI-----              | 45 |
| BnABBX41 | -----MGKKKCEILDCG-VARMFCESDQASLCWNCDGKVHGANFL-VAKHTRCLL-----              | 47 |
| BnCBX90  | -----MAKKKCEILCDR-VARMFCESDQASLCWDCDGNVHGANFL-VAKHTRCLL-----              | 47 |
| BnABBX7  | -----MEKMKCEILCEG-VARMFCESDQASLCWDCDGNVHGANFL-VAKHARCLL-----              | 47 |
| BnABBX2  | -----VSCDLCEG-NAAVYCEADTAFLLCRKCDRWVHSA-----                              | 32 |
| BnCBX53  | -----VSCDLCEG-NAAVYCEADTAFLLCRKCDRWVHSA-----                              | 32 |
| BnABBX5  | -----SVPVRCEILCGG-DASVFCEADTAFLLCRKCDRWVHGANFL-AWRHVRRVLCTACQKLTRKCL----- | 59 |
| BnCBX66  | -----PVRCEILCGG-DASVFCEADTAFLLCRKCDRWVH-----                              | 31 |
| BnCBX99  | NEEENRSVHGGCRSLCTRPSVPVRCEILCGG-DASVFCEADTAF-----                         | 42 |
| BnCBX95  | -----ASVFCEADSAFLCRKCDRWVH-----                                           | 21 |
| BnABBX20 | -----VKSCEILCG-AEADLHCAADS AFLCRSCDAKFHAS-----                            | 33 |
| BnCBX70  | -----VKSCEILCG-AEADLHCAADS AFLCRSCDAKFHASNILL-FSRHVVRTIC-----             | 46 |
| BnCBX61  | -----ICEILCG-AEAHLHCDADSAYLRCSDVKFHASNFL-FSRHVRRAI-----                   | 43 |
| BnABBX29 | -----RLCEVCKAYRAVVYCIADAASLCLTCDAKVHSANAL-SGRHLRTLILCGFCKNQP-----         | 53 |
| BnCBX76  | -----RLCEVCKAYRAVVYCIADAASLCLTCDAKVHSANAL-SGRHLRTLILCGFCKNQP-----         | 53 |
| BnABBX1  | -----WCDVCDKEEASVFCCADEAALCNGCDRHVH-----                                  | 30 |
| BnCBX51  | -----WCDVCDKEEASVFCCADEAALCNGCDRHVHFANKL-AGKHLRFSLT-----                  | 45 |
| BnABBX32 | -----WCDVCDKEEASVFCCADEAALCNGCDRHVHFANKL-AGKHQRFSLT-----                  | 45 |
| BnCBX64  | -----WCDVCDKEEASVFCCADEAALCNGCDRHVHFANKL-AGKHQRFSLT-----                  | 45 |
| BnABBX9  | -----RCDVCDKEEALVFCTADEASLCGGCDHRVH-----                                  | 30 |
| BnCBX57  | -----RCDVCDKEEASVFCTADEASLCGGCDHRVHHANKL-ASKHLRFSL-----                   | 44 |
| BnABBX27 | -----RCDVCDKEEASVFCTADEASLCGGCDHQVHHANKL-ASKHLRFSL-----                   | 44 |
| BnCBX74  | -----RCDVCDKEEASVFCTADEASLCGGCDHQVHHANKL-ASKHLRFSL-----                   | 44 |
| BnABBX44 | -----RCDVCDKEEASVFCTADEASLCGGCDHRVHHANKL-ASKHLRFSL-----                   | 44 |
| BnCBX78  | -----RCDVCDKEEASVFCTADEASLCGGCDHRVHHANKL-ASKHLRFSL-----                   | 44 |
| BnABBX10 | -----CNVCEAAEA AVLCCADEAALCWACDEKIHAANKL-AEKHQRVPL-----                   | 43 |
| BnCBX58  | -----CNVCEAAEA AVLCCADEAALCWACDEKIHAANKL-AEKHQRVPL-----                   | 43 |
| BnCBX77  | -----CNVCEAAEA AVLCCADEAALCWS CDEKVHAANKL-AGKHQRVPL-----                  | 43 |
| BnCBX79  | -----CNVCEAAEA AVLCCADEAALCWACDEKVHAANKL-AGKHQRVPL-----                   | 43 |
| BnABBX30 | -----CNVCEAAEA AVLCCADEAALCWS CDEKVHAANKL-AGKHQRVPL-----                  | 43 |
| BnABBX48 | -----CNVCETA EA AVLCCADEAALCLACDEKVHTANKL-AGKHQRVPL-----                  | 43 |
| BnCBX73  | -----CNVCETA EA AVLCCADEAALCLACDEKVHAANKL-AGKHQRVPL-----                  | 43 |
| BnABBX38 | -----QCEVCEKAEAEVLCCSDEAALCKPCDITVHEANKL-FQRHHRVPL-----                   | 44 |
| BnCBX89  | -----IQCEVCEKAEAEVLCCSDEAALCKPCDITVHEANKL-FQRHHRVPL-----                  | 45 |
| BnABBX16 | -----CDVCEKAPATLICC ADEAALCASCDVEVHAANKL-ASKHQRLFL-----                   | 43 |
| BnCBX68  | -----CDVCEKAPATLICC ADEAALCASCDVEVHAANKL-ASKHQRLFL-----                   | 43 |
| BnABBX19 | -----CDVCEKAPATLICC ADEAALCAKCDIEVHAANKL-ASKHQRLFL-----                   | 43 |
| BnCBX98  | -----CDVCEKAPATLICC ADEAALCAKCDIEVHAANKL-ASKHQRLFL-----                   | 43 |
| BnABBX13 | -----QEKA AFIFCVEDRALLCRDYDEATHA-----                                     | 26 |
| BnABBX36 | -----CDVCEKAPATVICC ADEAALCPRCDVEIHAANKL-ASKHQ-----                       | 40 |
| BnCBX84  | -----CDVCEKAPATVICC ADEAALCPKCDVEIHAANKL-ASKHQ-----                       | 40 |

|           |                                                         |    |
|-----------|---------------------------------------------------------|----|
| BnABBx40  | -----CDVCENAPATVICCADAEEALCPKCDVEIHAANKL-ASKHQ          | 40 |
| BnCBbX69  | -----CDVCENAPATVICCADAEEALCPKCDVEIHAANKL-ASKHQ          | 40 |
| BnABBx39  | -----CDVCENAPATVICCADAEEALCPKCDVEIHAANKL-ASKHQ          | 40 |
| BnCBbX87  | -----CDVCENAPATVICCADAEEALCPKCDVEIHAANKL-ASKHQ          | 40 |
| BnABBx33  | -----LCDACENAAAIIVFCAADEEALCRPCDEKVHMCNKL-ASRHVR        | 41 |
| BnCBbX63  | -----LCDACENAAAIIVFCAADEEALCRPCDEKVHMCNKL-ASRHVR        | 41 |
| BnCBbX83  | -----LCDACENAAAIIVFCAADEEALCRACDEKVHMCNKL-ASRHVR        | 41 |
| BnABBx25  | -----APCDDICENAPAFFYCEIDGSSLCLQCDMVVHVGGK--RTHGRFLI     | 44 |
| BnCBbX85  | -----LCDVCESAAAIIVFCAADEEALCCSCDEKVHMCNKL-ASRHVR        | 41 |
| BnABBx3   | -----CESCLKADADSFCPQHNFCLCYNCDIKIH                      | 29 |
| BnABBx8   | -----RACDSCLKRRARWYCAADDAFLCHSCDGSVHSANPL-ARRHERVLI     | 45 |
| BnCBbX56  | -----ARACDSCLKRRARWYCAADDAFLCHSCDGSVHSANPL-ARRHERVL     | 45 |
| BnCBbX75  | -----RACDNCVKKRARWYCAADDAFLCHFCD                        | 27 |
| BnABBx28  | -----RACDSCVKKRARWYCAADDAFLCHSCD                        | 27 |
| BnABBx31  | -----ARACDSCVKRRARWYCAADDAFLCQSCDTLVHSANLL-ARRHERVLI    | 46 |
| BnCBbX97  | -----ARACDSCVKRRARWYCAADDAFLCQSCDTLVHSANLL-ARRHERVLI    | 46 |
| BnCBbX80  | -----ACDSCVKRRARWYCAADDAFLCQSCDTLVHSANLL-ARRHERVLI      | 44 |
| BnABBx46  | -----ACDSCVKKRARWYCAADDAFLCQSCDTLVHSANPL-ARRHERVRL      | 44 |
| BnCBbX72  | -----ACDSCVKKRARWYCAADDAFLCQSCDTLVHSANPL-ARRHERVRLK     | 45 |
| BnABBx35  | -----RTCDNCLKKQAHWFCAADEAFLCQSCDTSVHSANLL-ARRHERVRL     | 45 |
| BnCBbX94  | -----RTCDNCLKKRAHWFCAADEAFLCQSCDTSVHSANLL-ARRHERVPL     | 45 |
| BnABBx22  | -----CELCLNKHAVWYCASDDAFLCHVCDESVHRANQV-ATKHDRVCL       | 43 |
| BnABBx6   | -----VCNTCRSAACTVYCRADSAYLCTSCDAQVHAANLL-ASRHERRRV      | 44 |
| BnCBbX54  | -----ACNTCRSAACTVYCRADSAYLCTSCDAQVHAANLL-ASRHERRRV      | 44 |
| BnABBx42  | -----CDTICRSAACTVYCRADSAYLCTSCDAQTHAANRL-ASRHERRRV      | 43 |
| BnCBbX92  | -----CDTICRSAACTVYCRADSAYLCTNCDAQVHAANRL-ASRHERRRV      | 43 |
| BnABBx43  | -----RACDTCGSTICTVYCHADSAYLNCSCDAQVHSANRV-ASRHKRRRV     | 45 |
| BnCBbX93  | -----RACDTCGSTICTVYCHADSAYLNCSCDAQVHSANRV-ASRHKRRRV     | 45 |
| BnABBx49  | -----RACGTCRSAACTIYREADSTYLCTNCDARVHAA-----KRVR         | 37 |
| BnABBx50  | -----RACDTCRSAACTIYREADSTYLCTTCDARVHAA-----KRVR         | 37 |
| BnABBx12  | -----RSCDACKSASAAVYCRFDSAFLCITCDTSIHSFT----RHERV        | 39 |
| BnCBbX55  | -----RSCDACKSASAAVFCRVDSAFLCITCDASIHST----RHERV         | 39 |
| BnCBbX91  | -----RSCDACQSVSAAVFCRVDSAFLCITCDTRIHSYT----RHERVFL      | 41 |
| BnABBx15  | -----MASRPCDSCRSAATLFCRADAAFLCGECDGKIHTANKL-ASRHERVLL   | 48 |
| BnCBbX67  | -----MASRPCDSCRSAATLFCRADAAFLCGECDGKIHSANKL-ASRHERVWL   | 48 |
| BnABBx23  | -----LCDSCKSATAALYCRPDAAFCLCLSCDSKVHAANKL-ASRHARVWM     | 44 |
| BnCBbX82  | -----MASKLCDSCKSATAALYCRPDAAFCLCLSCDSKVHAANKL-ASRHARVWM | 48 |
| BnABBx37  | -----LCDSCKSATAALYCRPDAAFCLCLSCDSKVHAANKL-ASRHARVWM     | 44 |
| BnCBbX88  | -----LCDSCKSATAALYCRPDAAFCLCLSCDSKVHAANKL-ASRHARVWM     | 44 |
| BnABBx45  | -----PMCDHCNMGKAVVYCKTHLARICSQCDRKLIHHYVTMDSPDHSRLLI    | 46 |
| BnCBbX86  | -----PMCDHCNMGKAVVYCKTHLARICSQCDRKLIHHYVTMDSPDHSRLLI    | 46 |
| BnABBx4   | -----EPKCDYCATTTQAI IYCKYDLAKLCLKCDVHVHSPNPL-SRRHMRSLI  | 46 |
| BnCBbX100 | -----EPKCDYCATTTQAI IYCKYDLAKLCLKCDVHVHSPNPL-SRRHMRSLI  | 46 |
| BnABBx14  | -----MCDFCGDQSRSMVYCRSDSACLCLSCDRSVHSANAL-SKRHSRTL      | 44 |
| BnCBbX60  | -----MCDFCGEQSRSMVYCRSDSACLCLSCDRSVHSANAL-SKRHSRTL      | 44 |
| BnABBx21  | -----MCDFCGEQSRSMVYCRSDAACLCLSCDRSVHSANAL-SKRHSRTL      | 44 |
| BnCBbX71  | -----MCDFCGEQSRSMVYCRSDAACLCLSCDRSVHSANAL-SKRHSRTL      | 44 |
| BnCBbX52  | -----MCDFCGEQSRSMVYCRSDAACLCLSCDRSIHSANAL-SKRHSRTL      | 44 |
| BnABBx11  | -----MCDFCNEQSRSMVYCRSDAACLCLSCDRNVHSANAL-SKRHSRTL      | 44 |
| BnCBbX59  | -----ICDFCNEQSRSMVYCRSDAACLCLSCDRNVHSANAL-SKRHSRTL      | 44 |
| BnABBx24  | -----MCDFCGEQSRSMVHCRSDAACLCLSCDRNVHSANAL-SKRHSRTL      | 44 |
| BnCBbX81  | -----MCDFCGEQSRSMVHCRSDAACLCLSCDRNVHSANAL-SKRHSRTL      | 44 |
| BnCBbX96  | -----CDFFCGERTAVLFCRADAAKLCLPCD                         | 25 |
| BnABBx17  | -----ERVPCDFFCGERTAVLFCRADAAKLCLSCDHHVHKANLL-SRKHVRS    | 47 |
| BnABBx47  | -----ERVPCDFFCGERTAVLFCRADAAKLCLSCDHHVHKANLL-SRKHVRS    | 47 |
| BnABBx26  | -----CEFFCGERAAVLFCRADIAKLCLPCDQHVHTANLL-SKKHVRSQI      | 43 |
| BnCBbX101 | -----PCDFFCGERTAVLFCRADIAKLCLPCDQVHVHTANLL-SKKHVRSQI    | 44 |
| BnABBx34  | -----VPCDFCNERAAVLFCEADAAKLCLPCDRHVHTANLL-SKKHVRSQI     | 45 |
| BnCBbX62  | -----ERVPCDFCNERAAVLFCEADAAKLCLPCDRHVHTANLL-SKKHVRSQI   | 47 |
| BnABBx18  | -----CDYCESSVALVYCKADSAKLCLACDNQVHVNTNQL-FSKHFRSLI      | 43 |
| BnCBbX65  | -----CDYCESSVALVYCKADSAKLCLACDNQVHVNTNQL-FSKHFRSLI      | 43 |

|         |                                       |     |     |  |
|---------|---------------------------------------|-----|-----|--|
|         | 90                                    | 100 | 110 |  |
|         | .... .... .... .... .... .... .... .. |     |     |  |
| BrBBx8  | -----                                 | 44  |     |  |
| BrBBx49 | -----                                 | 45  |     |  |
| BrBBx7  | -----                                 | 38  |     |  |
| BrBBx50 | -----                                 | 37  |     |  |
| BrBBx26 | -----                                 | 44  |     |  |
| BrBBx42 | -----                                 | 44  |     |  |
| BrBBx19 | -----                                 | 48  |     |  |
| BrBBx10 | -----                                 | 42  |     |  |

|         |       |    |
|---------|-------|----|
| BrBBX29 | ----- | 44 |
| BrBBX51 | ----- | 45 |
| BrBBX39 | ----- | 45 |
| BrBBX21 | ----- | 43 |
| BrBBX6  | ----- | 44 |
| BrBBX25 | ----- | 44 |
| BrBBX17 | ----- | 44 |
| BrBBX15 | ----- | 43 |
| BrBBX27 | ----- | 33 |
| BrBBX5  | ----- | 46 |
| BrBBX48 | ----- | 46 |
| BrBBX12 | ----- | 45 |
| BrBBX33 | ----- | 45 |
| BrBBX30 | ----- | 45 |
| BrBBX43 | ----- | 45 |
| BrBBX40 | ----- | 45 |
| BrBBX23 | ----- | 43 |
| BrBBX14 | ----- | 43 |
| BrBBX35 | ----- | 44 |
| BrBBX31 | ----- | 43 |
| BrBBX28 | ----- | 42 |
| BrBBX38 | ----- | 42 |
| BrBBX44 | ----- | 42 |
| BrBBX1  | ----- | 44 |
| BrBBX37 | ----- | 44 |
| BrBBX13 | ----- | 30 |
| BrBBX32 | ----- | 44 |
| BrBBX34 | ----- | 44 |
| BrBBX41 | ----- | 40 |
| BrBBX46 | ----- | 40 |
| BrBBX45 | ----- | 40 |
| BrBBX20 | ----- | 43 |
| BrBBX22 | ----- | 43 |
| BrBBX16 | ----- | 26 |
| BrBBX18 | ----- | 47 |
| BrBBX36 | ----- | 47 |
| BrBBX2  | ----- | 43 |
| BrBBX11 | ----- | 47 |
| BrBBX47 | ----- | 42 |
| BrBBX4  | ----- | 31 |
| BrBBX9  | ----- | 31 |
| BrBBX3  | ----- | 34 |
| BrBBX24 | ----- | 33 |
| BoBBX1  | ----- | 44 |
| BoBBX19 | ----- | 43 |
| BoBBX11 | ----- | 44 |
| BoBBX29 | ----- | 44 |
| BoBBX32 | ----- | 44 |
| BoBBX12 | ----- | 43 |
| BoBBX33 | ----- | 43 |
| BoBBX28 | ----- | 44 |
| BoBBX47 | ----- | 45 |
| BoBBX41 | ----- | 42 |
| BoBBX44 | ----- | 40 |
| BoBBX21 | ----- | 43 |
| BoBBX18 | ----- | 40 |
| BoBBX40 | ----- | 42 |
| BoBBX43 | ----- | 42 |
| BoBBX31 | ----- | 47 |
| BoBBX7  | ----- | 43 |
| BoBBX50 | ----- | 43 |
| BoBBX6  | ----- | 37 |
| BoBBX51 | ----- | 45 |
| BoBBX8  | ----- | 9  |
| BoBBX49 | ----- | 41 |
| BoBBX38 | ----- | 44 |
| BoBBX46 | ----- | 44 |
| BoBBX22 | ----- | 48 |
| BoBBX10 | ----- | 45 |
| BoBBX30 | ----- | 45 |
| BoBBX35 | ----- | 45 |
| BoBBX36 | ----- | 45 |

|          |                                         |    |
|----------|-----------------------------------------|----|
| BoBBX23  | -----                                   | 45 |
| BoBBX16  | -----                                   | 45 |
| BoBBX24  | -----                                   | 55 |
| BoBBX4   | -----                                   | 46 |
| BoBBX45  | -----                                   | 46 |
| BoBBX5   | -----                                   | 44 |
| BoBBX27  | -----                                   | 44 |
| BoBBX14  | -----                                   | 44 |
| BoBBX13  | -----                                   | 44 |
| BoBBX17  | -----                                   | 47 |
| BoBBX34  | -----                                   | 44 |
| BoBBX52  | -----                                   | 44 |
| BoBBX20  | -----                                   | 43 |
| BoBBX2   | -----                                   | 43 |
| BoBBX39  | -----                                   | 43 |
| BoBBX42  | -----                                   | 47 |
| BoBBX9   | -----                                   | 47 |
| BoBBX48  | -----                                   | 47 |
| BoBBX3   | -----                                   | 31 |
| BoBBX25  | -----                                   | 21 |
| BoBBX15  | -----                                   | 41 |
| BoBBX26  | -----                                   | 45 |
| BnABBX41 | -----                                   | 47 |
| BnCBBX90 | -----                                   | 47 |
| BnABBX7  | -----                                   | 47 |
| BnABBX2  | -----                                   | 32 |
| BnCBBX53 | -----                                   | 32 |
| BnABBX5  | VGDNYHVVLP SATAGEAAVEDITIRSEQDSNDDEV PY | 96 |
| BnCBBX66 | -----                                   | 31 |
| BnCBBX99 | -----                                   | 42 |
| BnCBBX95 | -----                                   | 21 |
| BnABBX20 | -----                                   | 33 |
| BnCBBX70 | -----                                   | 46 |
| BnCBBX61 | -----                                   | 43 |
| BnABBX29 | -----                                   | 53 |
| BnCBBX76 | -----                                   | 53 |
| BnABBX1  | -----                                   | 30 |
| BnCBBX51 | -----                                   | 45 |
| BnABBX32 | -----                                   | 45 |
| BnCBBX64 | -----                                   | 45 |
| BnABBX9  | -----                                   | 30 |
| BnCBBX57 | -----                                   | 44 |
| BnABBX27 | -----                                   | 44 |
| BnCBBX74 | -----                                   | 44 |
| BnABBX44 | -----                                   | 44 |
| BnCBBX78 | -----                                   | 44 |
| BnABBX10 | -----                                   | 43 |
| BnCBBX58 | -----                                   | 43 |
| BnCBBX77 | -----                                   | 43 |
| BnCBBX79 | -----                                   | 43 |
| BnABBX30 | -----                                   | 43 |
| BnABBX48 | -----                                   | 43 |
| BnCBBX73 | -----                                   | 43 |
| BnABBX38 | -----                                   | 44 |
| BnCBBX89 | -----                                   | 45 |
| BnABBX16 | -----                                   | 43 |
| BnCBBX68 | -----                                   | 43 |
| BnABBX19 | -----                                   | 43 |
| BnCBBX98 | -----                                   | 43 |
| BnABBX13 | -----                                   | 26 |
| BnABBX36 | -----                                   | 40 |
| BnCBBX84 | -----                                   | 40 |
| BnABBX40 | -----                                   | 40 |
| BnCBBX69 | -----                                   | 40 |
| BnABBX39 | -----                                   | 40 |
| BnCBBX87 | -----                                   | 40 |
| BnABBX33 | -----                                   | 41 |
| BnCBBX63 | -----                                   | 41 |
| BnCBBX83 | -----                                   | 41 |
| BnABBX25 | -----                                   | 44 |
| BnCBBX85 | -----                                   | 41 |
| BnABBX3  | -----                                   | 29 |

|           |       |    |
|-----------|-------|----|
| BnABBX8   | ----- | 45 |
| BnCBBX56  | ----- | 45 |
| BnCBBX75  | ----- | 27 |
| BnABBX28  | ----- | 27 |
| BnABBX31  | ----- | 46 |
| BnCBBX97  | ----- | 46 |
| BnCBBX80  | ----- | 44 |
| BnABBX46  | ----- | 44 |
| BnCBBX72  | ----- | 45 |
| BnABBX35  | ----- | 45 |
| BnCBBX94  | ----- | 45 |
| BnABBX22  | ----- | 43 |
| BnABBX6   | ----- | 44 |
| BnCBBX54  | ----- | 44 |
| BnABBX42  | ----- | 43 |
| BnCBBX92  | ----- | 43 |
| BnABBX43  | ----- | 45 |
| BnCBBX93  | ----- | 45 |
| BnABBX49  | ----- | 37 |
| BnABBX50  | ----- | 37 |
| BnABBX12  | ----- | 39 |
| BnCBBX55  | ----- | 39 |
| BnCBBX91  | ----- | 41 |
| BnABBX15  | ----- | 48 |
| BnCBBX67  | ----- | 48 |
| BnABBX23  | ----- | 44 |
| BnCBBX82  | ----- | 48 |
| BnABBX37  | ----- | 44 |
| BnCBBX88  | ----- | 44 |
| BnABBX45  | ----- | 46 |
| BnCBBX86  | ----- | 46 |
| BnABBX4   | ----- | 46 |
| BnCBBX100 | ----- | 46 |
| BnABBX14  | ----- | 44 |
| BnCBBX60  | ----- | 44 |
| BnABBX21  | ----- | 44 |
| BnCBBX71  | ----- | 44 |
| BnCBBX52  | ----- | 44 |
| BnABBX11  | ----- | 44 |
| BnCBBX59  | ----- | 44 |
| BnABBX24  | ----- | 44 |
| BnCBBX81  | ----- | 44 |
| BnCBBX96  | ----- | 25 |
| BnABBX17  | ----- | 47 |
| BnABBX47  | ----- | 47 |
| BnABBX26  | ----- | 43 |
| BnCBBX101 | ----- | 44 |
| BnABBX34  | ----- | 45 |
| BnCBBX62  | ----- | 47 |
| BnABBX18  | ----- | 43 |
| BnCBBX65  | ----- | 43 |
