# Supplementary material for: Genome-Wide Identification, Evolution, and Comparative Analysis of B-Box Genes in Brassica rapa, B. oleracea, and B. napus and Their Expression Profiling in B. rapa in Response to Multiple Hormones and Abiotic Stresses
Source: MDPI journal article supplement (doi:10.3390/ijms221910367), 2021-09-26
Supplement: s1 [file s1]

|         | 10           | 20               | 30               | 40                 | 50                  | 60               | 70    |    |
|---------|--------------|------------------|------------------|--------------------|---------------------|------------------|-------|----|
| BrBBX8  | -----        | REARVMRYREKKKTR  | -----            | KFEKRVRYASRKAYAE   | TRPRIKGRFVKRE       | -----            |       | 44 |
| BrBBX49 | -----        | RKARVMRYREKKKTR  | -----            | KFEKITIRYASRKEYAE  | KRPRRIKGRFAKRN      | -----            |       | 44 |
| BrBBX7  | -----        | -----            | KRVRVCDSCESAPA   | -----              | AFFCCKADAASLCTACDAE | IHSANPLARRHQRVPI | ----- | 48 |
| BrBBX50 | DAQVHSANRVAS | SRHKRVVCESECRAPA | -----            | AFMCEADDVSLCTACDLE | VHSANPLARRHQRVPV    | -----            |       | 62 |
| BrBBX26 | -----        | REARVMRYREKRKNR  | -----            | KFEKITIRYASRKAYAE  | MRPRIKGRFAKR        | -----            |       | 43 |
| BrBBX42 | -----        | REARVMRYREKRKNR  | -----            | KFEKITIRYASRKAYAE  | MRPRIKGRFAKR        | -----            |       | 43 |
| BrBBX19 | -----        | REARVLYRYREKRKNR | -----            | KFEKITIRYASRKAYAE  | VRPRIKGRFAKR        | -----            |       | 43 |
| BrBBX10 | -----        | REARVLYRYREKRKNR | -----            | KFEKITIRYASRKAYAE  | SRPRIKGRFAKR        | -----            |       | 43 |
| BrBBX29 | -----        | RDNAMQRYKEKRKTR  | -----            | RYDKTIRYESRKATAD   | TRLRVKGRFVKA        | -----            |       | 43 |
| BrBBX51 | -----        | RGNAMQRYKEKRKNR  | -----            | RYDKTIRYESRKARAD   | TRLRVKGRFVKA        | -----            |       | 43 |
| BrBBX39 | -----        | RDNAMQRYKEKRKTR  | -----            | RYDKTIRYESRKARAD   | TRLRVKGRFVKA        | -----            |       | 43 |
| BrBBX21 | -----        | RNSALSRYKAKKKSR  | -----            | RYEKHIRYESRKVRAE   | TRIRIIGRFAKS        | -----            |       | 43 |
| BrBBX6  | -----        | RNNAVVMRYKEKKKAR | -----            | KFDKTVRYASRKARAD   | VRRRVKGRFIKAG       | -----            |       | 44 |
| BrBBX25 | -----        | RNNAVVMRYKEKKKAR | -----            | KFDKTVRYASRKARAD   | VRRRVKGRFVKAG       | -----            |       | 44 |
| BrBBX17 | -----        | RNNAVVMRYKEKKKAR | -----            | KFDKRVRYASRKARAD   | VRRRVKGRFVKAG       | -----            |       | 44 |
| BrBBX15 | -----        | HATT             | RNNAVLYRYKEKKKAR | -----              | KFDKRVRYVSRKERAD    | VRRRVKGR         | ----- | 43 |
| BrBBX27 | -----        | RNNAVLYRYKEKKKAR | -----            | KFDKRVRYVSRKERAD   | VRRRVKGRFVKSG       | -----            |       | 44 |
| BrBBX5  | -----        | RNEAKLYRYKEKKLKR | -----            | TFGKQIRYASRKARAD   | TRKRVKGRFVKAG       | -----            |       | 44 |
| BrBBX48 | -----        | -----            | -----            | IRYESRKSSADTKKRL   | KGRFTKAD            | -----            |       | 24 |
| BrBBX12 | -----        | REARVSYRYREKRRTR | -----            | LFSSKIRYEVVKLNAE   | KRPRMKGRFVKRS       | -----            |       | 44 |
| BrBBX33 | -----        | REARVSYRYREKRRTR | -----            | LFSSKIRYEVVKLNAE   | KRPRMKG             | -----            |       | 38 |
| BrBBX30 | -----        | REARVSYRYREKRRTR | -----            | LFSSKIRYEVVKLNAE   | KRPRMKGRFVKRA       | -----            |       | 44 |
| BrBBX43 | -----        | REARVSYRYREKRRTR | -----            | LFSSKIRYEVVKLNAE   | KRPRMKGRFVKR        | -----            |       | 43 |
| BrBBX40 | -----        | REASVSYRYEKKKTR  | -----            | SFTKITIRYE         | -----               | -----            |       | 24 |
| BrBBX23 | -----        | REARVMRYRDKRKNR  | -----            | LFEEKIRYEVVKVNAD   | KRPRIKGRFVRRS       | -----            |       | 44 |
| BoBBX7  | -----        | REARVMRYREKKKTR  | -----            | KFEKRVRYASRKAYAE   | TRPRIKGRFVKRE       | -----            |       | 44 |
| BoBBX50 | -----        | -----            | -----            | YASRKEYAEKRPRRIK   | GRFAKRN             | -----            |       | 22 |
| BoBBX6  | -----        | REARVLYRYREKKKRR | -----            | KFEKITIRYASRKAYAE  | VRPRIKGRFAKR        | -----            |       | 43 |
| BoBBX51 | -----        | REARVLYRYREKKKRR | -----            | KFEKITIRYASRKAYAE  | RRPRIKGRFAKMS       | -----            |       | 44 |
| BoBBX8  | -----        | REARVLYRYREKRKNR | -----            | KFEKITIRYASRKAYAE  | SRPRIKGRFAKR        | -----            |       | 43 |
| BoBBX49 | -----        | REARVLYRYREKRKNR | -----            | KFEKITIRYASRKAYAE  | SRPRIKGRFAKR        | -----            |       | 43 |
| BoBBX38 | -----        | -----            | REKRKNR          | -----              | KFEKITIRYASRKAYAE   | MRPRIKGRFAKR     | ----- | 35 |
| BoBBX46 | -----        | REARVMRYREKRKNR  | -----            | KFEKITIRYASRKAYAE  | MRPRIKGRFAKR        | -----            |       | 43 |
| BoBBX22 | -----        | REARVLYRYREKRKNR | -----            | KFEKITIRYASRKAYAE  | VRPRIKGRFAKR        | -----            |       | 43 |
| BoBBX10 | -----        | REARVSYRYREKRRTR | -----            | LFSSKIRYEVVKLNAE   | KRPRMKGRFVKRS       | -----            |       | 44 |
| BoBBX30 | -----        | REARVSYRYREKRRTR | -----            | LFSSKIRYEVVKLNAE   | KRPRMKGRFVKRS       | -----            |       | 44 |
| BoBBX35 | -----        | REARVSYRYREKRRTR | -----            | LFSSKIRYEVVKLNAE   | KRPRMKGRFVKRA       | -----            |       | 44 |
| BoBBX36 | -----        | REARVSYRYREKRRTR | -----            | LFSSKIRYEVVKLNAE   | KRPRMKGRFVKRA       | -----            |       | 44 |
| BoBBX23 | -----        | REARVSYRYREKRRTR | -----            | LFSSKIRYEVVKLNAE   | KRPRMKGRFVKR        | -----            |       | 43 |
| BoBBX16 | -----        | REARVSYRYREKKKTR | -----            | SFTKITIRYEVVKLNAE  | NKPRMKGRFVKRA       | -----            |       | 44 |
| BoBBX24 | -----        | REARVMRYRDKRKNR  | -----            | LFEEKIRYEVVKVNAD   | KRPRIKGRFVRRS       | -----            |       | 44 |
| BoBBX4  | -----        | RNEAKLYRYKEKKLKR | -----            | TFGKQIRYASRKARAD   | TRKRVKGRFVKAG       | -----            |       | 44 |
| BoBBX45 | -----        | -----            | -----            | KFGKKIRYESRKSSAD   | TKKRLKGRFTKADAEYD   | YDPRANNTTKE      | ----- | 44 |
| BoBBX5  | -----        | -----            | -----            | SRKARADVRRRVKGR    | FIKAGEAYD           | -----            |       | 24 |
| BoBBX27 | -----        | SHSVT            | RNNAVVMRYKEKKKAR | -----              | KFDKTVRYASRKARAD    | VRRRVKGR         | ----- | 44 |
| BoBBX14 | -----        | -----            | RNNAVVMRYKEKKKAR | -----              | KFDKRVRYASRKARAD    | VRRRVKGRFVKAG    | ----- | 44 |
| BoBBX13 | -----        | -----            | RNNAVLYRYKEKKKAR | -----              | KFDKRVRYVSRKERAD    | VRRRVKGRFVKSG    | ----- | 44 |
| BoBBX37 | -----        | -----            | RNNAVLYRYKEKKKAR | -----              | KFDKRVRYVSRKERAD    | VRRRVKGRFVKSG    | ----- | 44 |
| BoBBX17 | -----        | -----            | RDNAMQRYKEKRKNR  | -----              | RYDKTIRYESRKARAD    | TRLRVKGRFVKA     | ----- | 43 |

|           |       |                  |    |                                |       |    |
|-----------|-------|------------------|----|--------------------------------|-------|----|
| BnABBX12  | ----- | REARVLRYREKRKNR  | -- | KFEKTIIRYASRKAYAESRPRIKGRFAKR  | ----- | 43 |
| BnCBBX55  | ----- | REARVLRYREKRKNR  | -- | KFEKTIIRYASRKAYAESRPRIKGRFAKR  | ----- | 43 |
| BnCBBX91  | ----- | REARVLRYREKRKNR  | -- | KFEKTIIRYASRKAYAESRPRIKGRFAKR  | ----- | 43 |
| BnABBX15  | ----- | REARVLRYREKRKNR  | -- | KFEKTIIRYASRKAYAAEVRPRIKGRFAKR | ----- | 43 |
| BnCBBX67  | ----- | REARVLRYREKRKNR  | -- | KFEKTIIRYASRKAYAAEVRPRIKGRFAKR | ----- | 43 |
| BnABBX23  | ----- | REARVMRYREKRKNR  | -- | KFEKTIIRYASRKAYAEMRPRIKGRFAKR  | ----- | 43 |
| BnCBBX82  | ----- | REARVMRYREKRKNR  | -- | KFEKTIIRYASRKAYAEMRPRIKGRFAKR  | ----- | 43 |
| BnABBX37  | ----- | REARVMRYREKRKNR  | -- | KFEKTIIRYASRKAYAEMRPRIKGRFAKR  | ----- | 43 |
| BnCBBX88  | ----- | REARVMRYREKRKNR  | -- | KFEKTIIRYASRKAYAEMRPRIKGRFAKR  | ----- | 43 |
| BnABBX45  | ----- |                  |    | IRYESRKSSADTKKRLKGRFTKAD       | ----- | 24 |
| BnCBBX86  | ----- |                  |    | IRYESRKSSADTKKRLKGRFTKAD       | ----- | 24 |
| BnABBX4   | ----- | RNEAKLRYKEKKLKR  | -- | TFGKQIRYASRKARADTRKRVKGRFVKAG  | ----- | 44 |
| BnCBBX100 | ----- | RNEAKLRYKEKKLKR  | -- | TFGKQIRYASRKARADTRKRVKGRFVKAG  | ----- | 44 |
| BnABBX14  | ----- | RNNAVMRYKEKKKKAR | -- | KFDKRVRYASRKARADVRRRVKGRFVKAG  | ----- | 44 |
| BnCBBX60  | ----- | RNNAVMRYKEKKKKAR | -- | KFDKRVRYASRKARADVRRRVKGRFVKAG  | ----- | 44 |
| BnABBX21  | ----- | RNNAVMRYKEKKKKAR | -- | KFDKTVRYASRKARADVRRRVKGRFVKAG  | ----- | 44 |
| BnCBBX71  | ----- | RNNAVMRYKEKKKKAR | -- | KFDKTVRYASRKARADVRRRVKG        | ----- | 38 |
| BnCBBX52  | ----- | RNNAVMRYKEKKKKAR | -- | KFDKTVRYASRKARADVRRRVKGRFVKAG  | ----- | 44 |
| BnABBX11  | ----- | RNNAVLRYKEKKKKAR | -- | KFDKRVRYVSRKERADVRRRVKGRFVKSG  | ----- | 44 |
| BnCBBX59  | ----- | RNNAVLRYKEKKKKAR | -- | KFDKRVRYVSRKERADVRRRVKGRFVKSG  | ----- | 44 |
| BnABBX24  | ----- | RNNAVIRYKEKKKKAR | -- | KFDKRVRYVSRKERADVRRRVKGRFVKSG  | ----- | 44 |
| BnCBBX81  | ----- | RNNAVIRYKEKKKKAR | -- | KFDKRVRYVSRKERADVRRRVKGRFVKSG  | ----- | 44 |
| BnABBX17  | ----- | RGNAMQRYKEKRKNR  | -- | RYDKTIIRYESRKARADTRLRVKGRFVKA  | ----- | 43 |
| BnABBX47  | ----- | RGNAMQRYKEKRKNR  | -- | RYDKTIIRYESRKARADTRLRVKGRFVKA  | ----- | 43 |
| BnABBX26  | ----- | RDNAMQRYKEKRKTRS | -- | RYDKTIIRYESRKATADTRLRVKGRFVKA  | ----- | 44 |
| BnCBBX101 | ----- | RDNAMQRYKEKRKTRS | -- | RYDKTIIRYESRKATADTRLRVKGRFVKA  | ----- | 44 |
| BnABBX34  | ----- | NRDNAMQRYKEKRKNR | -- | RYDKTIIRYESRKARADTRLRVKGRFVKAT | ----- | 45 |
| BnABBX18  | ----- | RNSALSRYKAKKKSR  | -- | RYEKHIRYESRKVRAESRIIRIRGRFAKS  | ----- | 43 |
