# Supplementary material for: Genome-Wide Identification, Evolution, and Comparative Analysis of B-Box Genes in Brassica rapa, B. oleracea, and B. napus and Their Expression Profiling in B. rapa in Response to Multiple Hormones and Abiotic Stresses
Source: MDPI journal article supplement (doi:10.3390/ijms221910367), 2021-09-26
Supplement: s1 [file s1]

|          | 10    | 20                                                | 30         | 40       | 50  | 60 | 70 |    |
|----------|-------|---------------------------------------------------|------------|----------|-----|----|----|----|
| BoBBX1   | ----- | PLCDICGERRALLFCQKDRAILCRECDIPIHQANEHTKKHNRFL      |            |          |     |    |    | 45 |
| BoBBX19  | ----- | PLCDICGERRALLFCQEDRAILCRECDIPIHQANEHTKKHNRFL      |            |          |     |    |    | 45 |
| BoBBX11  | ----- | PLCDICQEKKALLFCQQDRAILCKDCDSSIHSANEQVKKHNRFL      |            |          |     |    |    | 45 |
| BoBBX29  | ----- | ICDICQEKKALLFCQQDRAILCKDCDTSIHSANEHKKKHNRFL       |            |          |     |    |    | 44 |
| BoBBX32  | ----- | CDICQEKKALLFCQQDRAILCKDCDSSIHSANEHTKKKHNRFL       |            |          |     |    |    | 43 |
| BoBBX12  | ----- | PKCDICQEASGFFFCLODRAILCRKCDVAIHTVNPVSAHQRFLL      |            |          |     |    |    | 45 |
| BoBBX33  | ----- | PKCDICQEASGFFFCLODRAILCRKCDVAIHTVNPVSAHQRFLL      |            |          |     |    |    | 45 |
| BoBBX28  | ----  | SKPKCDICQEATGFFFCLODRAILCRKCDVSIHTVNPVSAHQRFLL    |            |          |     |    |    | 47 |
| BoBBX47  | TTSSA | APICDICKERKGYFFCLDDRALLCNDGAIHIC                  | ----       | SSHQRFLL |     |    |    | 47 |
| BoBBX41  | ----- | RRCDICQEKAAFIFCVEDRAILCRDCDESIHVANSRSANHQRFLL     |            |          |     |    |    | 45 |
| BoBBX44  | ----- | PRCDICQEKAAFIFCVEDRAILCKDCDESIHLANSRSANHQRFLL     |            |          |     |    |    | 4  |
| BoBBX21  | ----- | PPCDICLEKAAFIFCVEDRAILCRDCDEGTHAPNTRSANHQRFLL     |            |          |     |    |    | 44 |
| BoBBX18  | ----- | APCDICENAPAFFYCEIDGSSSLCQCDMVVHVGGKR              | --         | THGRFLL  |     |    |    | 44 |
| BoBBX40  | ----- | APCDICENAPAFFYCEIDGSSSLCQCDMVVHVGGKR              | --         | THGRFLL  |     |    |    | 44 |
| BoBBX43  | ----- | APSCDICENAPAFFYCEIDGSSSLCQCDMVVHVGGKR             | --         | THRRFLL  |     |    |    | 44 |
| BoBBX31  | ----- | CGFCCKNPQCVVRCLDHKMFCLNGCNEKIHGVS                 | --         | SKHVRHDV |     |    |    | 41 |
| BoBBX7   | ---   | ERVRVCEACERAPAAFFCKADAASLCIACDSQVHLANPLARRHQRFLL  |            |          |     |    |    | 48 |
| BoBBX50  | ---   | ERVRVCEQSCERAPAAFFCKADAASLCIACDSQIHSANPLARRHQRFLL |            |          |     |    |    | 48 |
| BoBBX6   | --    | AKRVRVGDSCESAPAAFLCKADAASLCIACDAEIHSANPLASRHQRFLL |            |          |     |    |    | 53 |
| BoBBX51  | ---   | KRVRVCECERAPAAFMCEADDVSLCTACDLEVHSANPLARRHQRFLL   |            |          |     |    |    | 48 |
| BoBBX8   | ----- | ICEVCEQAPAAVTCKADAASLCVTCDSDIHSANPLASRHQRFLL      |            |          |     |    |    | 44 |
| BoBBX49  | ----- | ICEVCEQAPAAVTCKADAASLCVTCDSDIHSANPLASRHQRFLL      |            |          |     |    |    | 44 |
| BoBBX38  | ---   | RVVMCEVCEQAPAAVTCKADAAALCVTCDRDIHSANPLARRHQRFLL   |            |          |     |    |    | 45 |
| BoBBX46  | ---   | RVVMCEVCEQAPAAVTCKADAAALCVTCDRDIHSANPLARRHQRFLL   |            |          |     |    |    | 47 |
| BoBBX22  | ---   | RVWLCEVCEQAPAAVTCKADAAALCVTCDRDIHSANPLSRRHQRFLL   |            |          |     |    |    | 47 |
| BoBBX5   | ----- | VCERCNAQPAIVRCVEERVS                              | LCQNC      | DW       |     |    |    | 27 |
| BoBBX27  | ----- | VCERCNAQPAIVRCVEERVS                              | LCQNC      | WSGH     |     |    |    | 30 |
| BoBBX14  | ----- | VCERCNAQPAIVRCVEERVS                              | LCQNC      | WSGH     |     |    |    | 30 |
| BoBBX13  | ----- | ICERCNAQPASVRCSDERVS                              | LCQNC      | WSGH     | NND |    |    | 33 |
| BoBBX37  | ----- | CERCNAQPASVRCSDERVS                               | LCQNC      | WLGH     |     |    |    | 29 |
| BoBBX17  | ----- | ICDNCGSEPVSVRCFTD                                 | SLVLCQCD   | WDVH     |     |    |    | 30 |
| BoBBX34  | ----- | ICDNCGSEPVSVRCFTD                                 | NLVLCQCD   | WDVH     |     |    |    | 30 |
| BoBBX52  | ----- | RICDNCGSEPVSVRCFTD                                | DLVLCLECD  | WDVH     |     |    |    | 31 |
| BoBBX20  | ----- | ICDSCDDSPSSVFC                                    | DTESVLCQNC | DWQ      |     |    |    | 28 |
| BnABBX1  | ----- | PLCDICGERRALLFCQEDRAILCRECDIPIHQANEHTKKHNRFL      |            |          |     |    |    | 45 |
| BnCBBX51 | ----- | PLCDICGERRALLFCQEDRAILCRECDIPIHQANEHTKKHNRFL      |            |          |     |    |    | 45 |
| BnABBX32 | ---   | KDAPLCDICGKRRALLFCQEDRAILCRECDIPIHQANEHTKKHNRFL   |            |          |     |    |    | 68 |
| BnCBBX64 | ----- | PLCDICGERRALLFCQEDRAILCRECDIPIHQANEHTKKHNRFL      |            |          |     |    |    | 65 |
| BnABBX9  | ----- | ICDICQEKKALLFCQEDRAILCKDCDSSIHSANEHVKKKHNRFL      |            |          |     |    |    | 44 |
| BnCBBX57 | ----- | PLCDICQEKKALLFCQQDRAILCKDCDSSIHSANEQVKKKHNRFL     |            |          |     |    |    | 45 |
| BnABBX27 | ----- | ICDICQEKKALLFCQQDRAILCKDCDTSIHSANEHKKKHNRFL       |            |          |     |    |    | 44 |
| BnABBX44 | ---   | NSSPICDICQEKKALLFCQQDRAILCKDCDSSIHSANEHTKKKHNRFL  |            |          |     |    |    | 48 |
| BnCBBX78 | ----- | CDICQEKKALLFCQQDRAILCKDCDSSIHSANEHTKKKHNRFL       |            |          |     |    |    | 43 |
| BnABBX10 | ----- | PKCDICQEASGFFFCLODRAILCRKCDVAIHTVNPVSAHQRFLL      |            |          |     |    |    | 45 |
| BnCBBX58 | ----- | PKCDICQEASGFFFCLODRAILCRKCDVAIHTVNPVSAHQRFLL      |            |          |     |    |    | 45 |
| BnCBBX77 | ----- | QEASGFFFCLODRAILCRKCDVAIHTVNPVSAHQRFLL            |            |          |     |    |    | 39 |
| BnCBBX79 | ----- | PKCDICQEASGFFFCLODRAILCRKCDVAIHTVNPVSAHQRFLL      |            |          |     |    |    | 45 |
| BnABBX30 | ----- | PKCDICQEASGFFFCLODRAILCRKCDVAIHTVNPVSAHQRFLL      |            |          |     |    |    | 45 |
| BnABBX48 | ----- | PKCDICQEATGFFFCLODRAILCRKCDVAIHTVNPVSAHQRFLL      |            |          |     |    |    | 45 |
| BnCBBX73 | ---   | SKPKCDICQEATGFFFCLODRAILCRKCDVSIHTVNPVSAHQRFLL    |            |          |     |    |    | 47 |
| BnABBX38 | ---   | STAPLCDICKERKGYFFCLDDRALLCNDGAIHIC                |            |          |     |    |    | 44 |
| BnCBBX89 | ---   | AAPLCDICKERKGYFFCLDDRALLCNDGAIHIC                 |            |          |     |    |    | 43 |
| BnABBX16 | ----- | PPCDICLEKAAFIFCVEDRAILCRDCDEATHAPNTRSANHQRFLL     |            |          |     |    |    | 44 |
| BnCBBX68 | ----- | PPCDICLEKAAFIFCVEDRAILCRDCDEATHAPNTRSANHQRFLL     |            |          |     |    |    | 44 |
| BnABBX19 | ----- | PPCDICLEKAAFIFCVEDRAILCRDCDEGTHAPNTRSANHQRFLL     |            |          |     |    |    | 44 |
| BnCBBX98 | ----- | PPCDICLEKAAFIFCVEDRAILCRDCDEGTHAPNTRSANHQRFLL     |            |          |     |    |    | 44 |
| BnABBX36 | ----- | PRCDICQEKAAFIFCVEDRAILCRDCDESIHVANTRSANHQRFLL     |            |          |     |    |    | 44 |
| BnCBBX84 | ----- | PRCDICQEKAAFIFCVEDRAILCRDCDESIHVANTRSANHQRFLL     |            |          |     |    |    | 44 |
| BnABBX40 | ----- | PRCDICQEKAAFIFCVEDRAILCRDCDESIHVANSRSANHQRFLL     |            |          |     |    |    | 44 |
| BnCBBX69 | ----- | PRCDICQEKAAFIFCVEDRAILCRDCDESIHVANSRSANHQRFLL     |            |          |     |    |    | 44 |
| BnABBX39 | ----- | PRCDICQEKAAFIFCVEDRAILCKDCDESIHVANSRSANHQRFLL     |            |          |     |    |    | 44 |
| BnCBBX87 | ----- | PRCDICQEKAAFIFCVEDRAILCKDCDESIHLANSRSANHQRFLL     |            |          |     |    |    | 44 |
| BnABBX33 | ----- | APCDICENAPAFFYCEIDGSSSLCQCDMVVHVGGKR              | --         | THGRFLL  |     |    |    | 44 |
| BnCBBX63 | ----- | APCDICENAPAFFYCEIDGSSSLCQCDMVVHVGGKR              | --         | THGRFLL  |     |    |    | 44 |
| BnCBBX83 | ----- | APCDICENAPAFFYCEIDGSSSLCQCDMVVHVGGKR              | --         | THGRFLL  |     |    |    | 44 |
| BnCBBX85 | ----- | APSCDICENAPAFFYCEIDGSSSLCQCDMVVHVGGKR             | --         | THRRFLL  |     |    |    | 44 |
| BnABBX6  | ---   | RVRVCEACERAPAAFFCKADAASLCIACDSQIHLNPLARRHQRFLL    |            |          |     |    |    | 47 |
| BnCBBX54 | ---   | ERVRVCEACERAPAAFFCKADAASLCIACDSQVHLANPLARRHQRFLL  |            |          |     |    |    | 48 |
| BnABBX42 | ---   | RVRVCEQSCERAPAAFFCKADAASLCIACDSQIHSANPLARRHQRFLL  |            |          |     |    |    | 47 |
| BnCBBX92 | ---   | RVRVCEQSCERAPAAFFCKADAASLCIACDSQIHSANPLARRHQRFLL  |            |          |     |    |    | 47 |

|           |                                                                                                   |    |
|-----------|---------------------------------------------------------------------------------------------------|----|
| BnABBX43  | ---KRVRVCESSCERAPAAFMCEADDVSLCTACDLEVHSANPLARRHQRVPV---                                           | 48 |
| BnCBBX93  | ---KRVRVCESSCERAPAAFMCEADDVSLCTACDLEVHSANPLARRHQRVPV---                                           | 49 |
| BnABBX49  | ---KRVRVCDSCESAPAEFFCKADAASLCTACDAEIHHSANPLARRHQRVPI---                                           | 48 |
| BnABBX50  | ---KRVRVCDSCESAPAEFFCKADAASLCTACDAEIHHSANPLARRHQRVPI---                                           | 48 |
| BnABBX12  | -----ICEVCEQAPAAVTCCKADAASLCVTCDSDIHSANPLASRHERVPV---                                             | 44 |
| BnCBBX55  | -----VCEVCEQAPAAVTCCKADAASLCVTCDSDIHSANPLASRHERVPV---                                             | 44 |
| BnCBBX91  | -----ICEVCEQAPAAVTCCKADAASLCVTCDSDIHSANPLASRHERVPV---                                             | 44 |
| BnABBX15  | ---ERVLLCQVCEQSPAHVTCCKADAAALCVTCDRDIHSANPLSRRHERVPV---                                           | 48 |
| BnCBBX67  | ---ERVVLLCQVCEQSPAHVTCCKADAAALCVTCDRDIHSANPLSRRHERVPV---                                          | 48 |
| BnABBX23  | ---ARVWMCEVCEQAPAHVTCCKADAAALCVTCDRDIHSANPLARRHERVPV---                                           | 48 |
| BnCBBX82  | ---ARVWMCEVCEQAPAHVTCCKADAAALCVTCDRDIHSANPLARRHERVPV---                                           | 48 |
| BnABBX37  | ---ARVWMCEVCEQAPAHVTCCKADAAALCVTCDRDIHSANPLARRHERVPV---                                           | 48 |
| BnCBBX88  | ---ARVWMCEVCEQAPAHVTCCKADAAALCVTCDRDIHSANPLARRHERVPV---                                           | 48 |
| BnABBX14  | -----VCERCNAQPAIVRCVEERVS L C Q N C D W S G H                                                     | 30 |
| BnCBBX60  | -----VCERCNAQPAIVRCVEERVS L C Q N C D W S G                                                       | 29 |
| BnABBX21  | -----VCERCNSQPAIVRCVEERVS L C Q N C D W S G H                                                     | 30 |
| BnCBBX71  | -----VCERCNAQPAIVRCVEERVS L C Q N C D W S G H                                                     | 30 |
| BnABBX11  | -----ICERCNAQPASVRCSDERVS L C Q N C D W S G H N N D A T S Q H K R Q S I                           | 43 |
| BnCBBX59  | -----ICERCNAQPASVRCSDERVS L C Q N C D W S G H N N D A T S Q H K R Q S I                           | 43 |
| BnABBX24  | -----ICERCNAQPASVRC T D E R V S L C Q N C D W L G H                                               | 30 |
| BnCBBX81  | -----ICERCNAQPASVRC T D E R V S L C Q N C D W L G H                                               | 30 |
| BnABBX17  | -----ICDSCGNPEPVSVRCTD D L V L C Q E C D W D V H G S C S ---HVRSAVEGFSGCPSAL                      | 50 |
| BnABBX47  | -----ICDSCGNPEPVSVRCTD D L V L C Q E C D W D V H G S C S ---HVRSAVEGFSGCPSAL                      | 50 |
| BnABBX26  | -----ICDNCGNPEPVSVRCTD N L V L C Q D C D W D V H G S C S V S D A H V R S A L E G F S G C P S A L  | 54 |
| BnCBBX101 | -----ICDNCGNPEPVSVRCTD N L V L C Q D C D W D V H G S C S V S D A H V R S A L E G F S G C P S A L  | 54 |
| BnABBX34  | -----ICDNCGSEPEPVSVRCTD S L V L C Q E C D W D V H G S C S V S D A H V R S A I E G F T G C P S A L | 54 |
| BnCBBX62  | -----ICDNCGSEPEPVSVRCTD S L V L C Q E C D W D V H G S C S V S D A H V R S A I E G F T G C P S A L | 54 |
| BnABBX18  | -----ICDSCDDSPSSVFC D T E S S V L C Q N C D W Q H H T S A S --S I H S R R P L                     | 42 |
| BnCBBX65  | -----ICDSCDDSPSSVFC D T E S S V L C Q N C D W Q                                                   | 28 |
