# Supplementary figures and images for: Genome-Wide Identification, Evolution, and Comparative Analysis of B-Box Genes in Brassica rapa, B. oleracea, and B. napus and Their Expression Profiling in B. rapa in Response to Multiple Hormones and Abiotic Stresses
Source: MDPI journal article supplement (doi:10.3390/ijms221910367), 2021-09-26

a

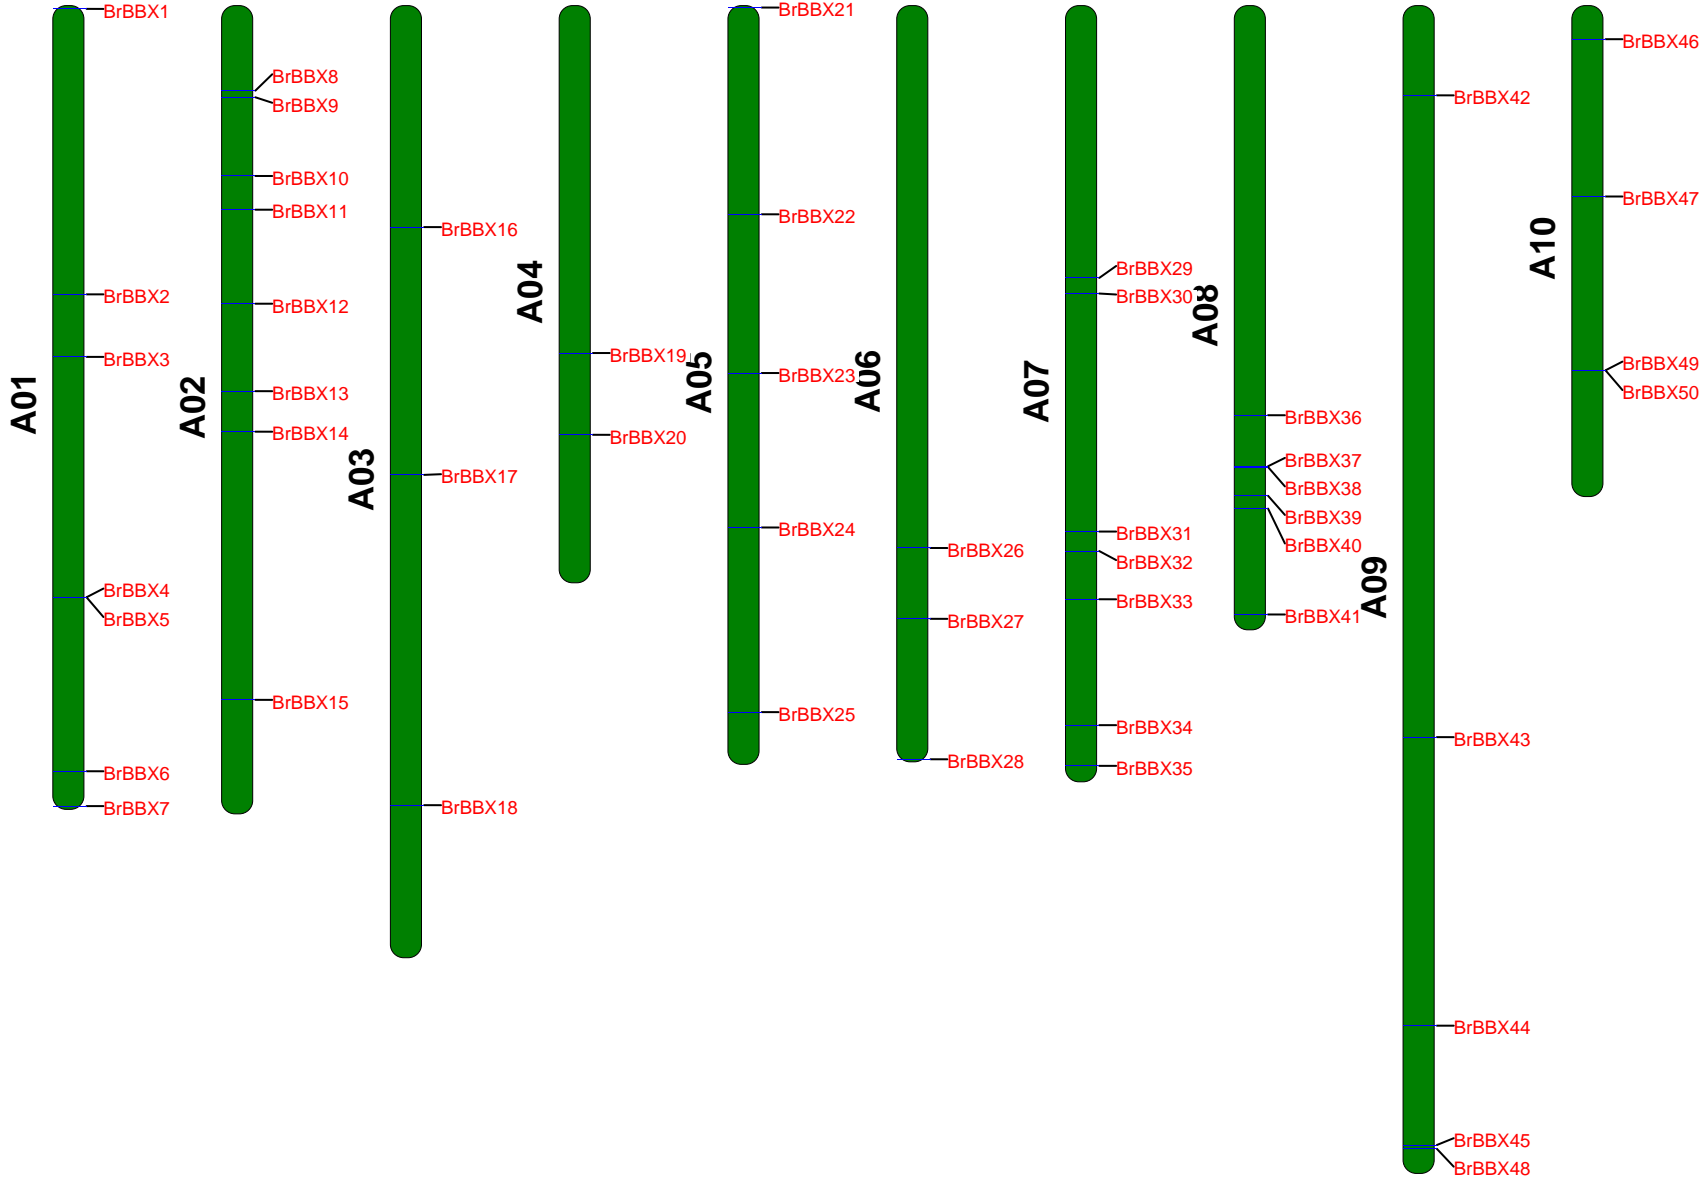

b

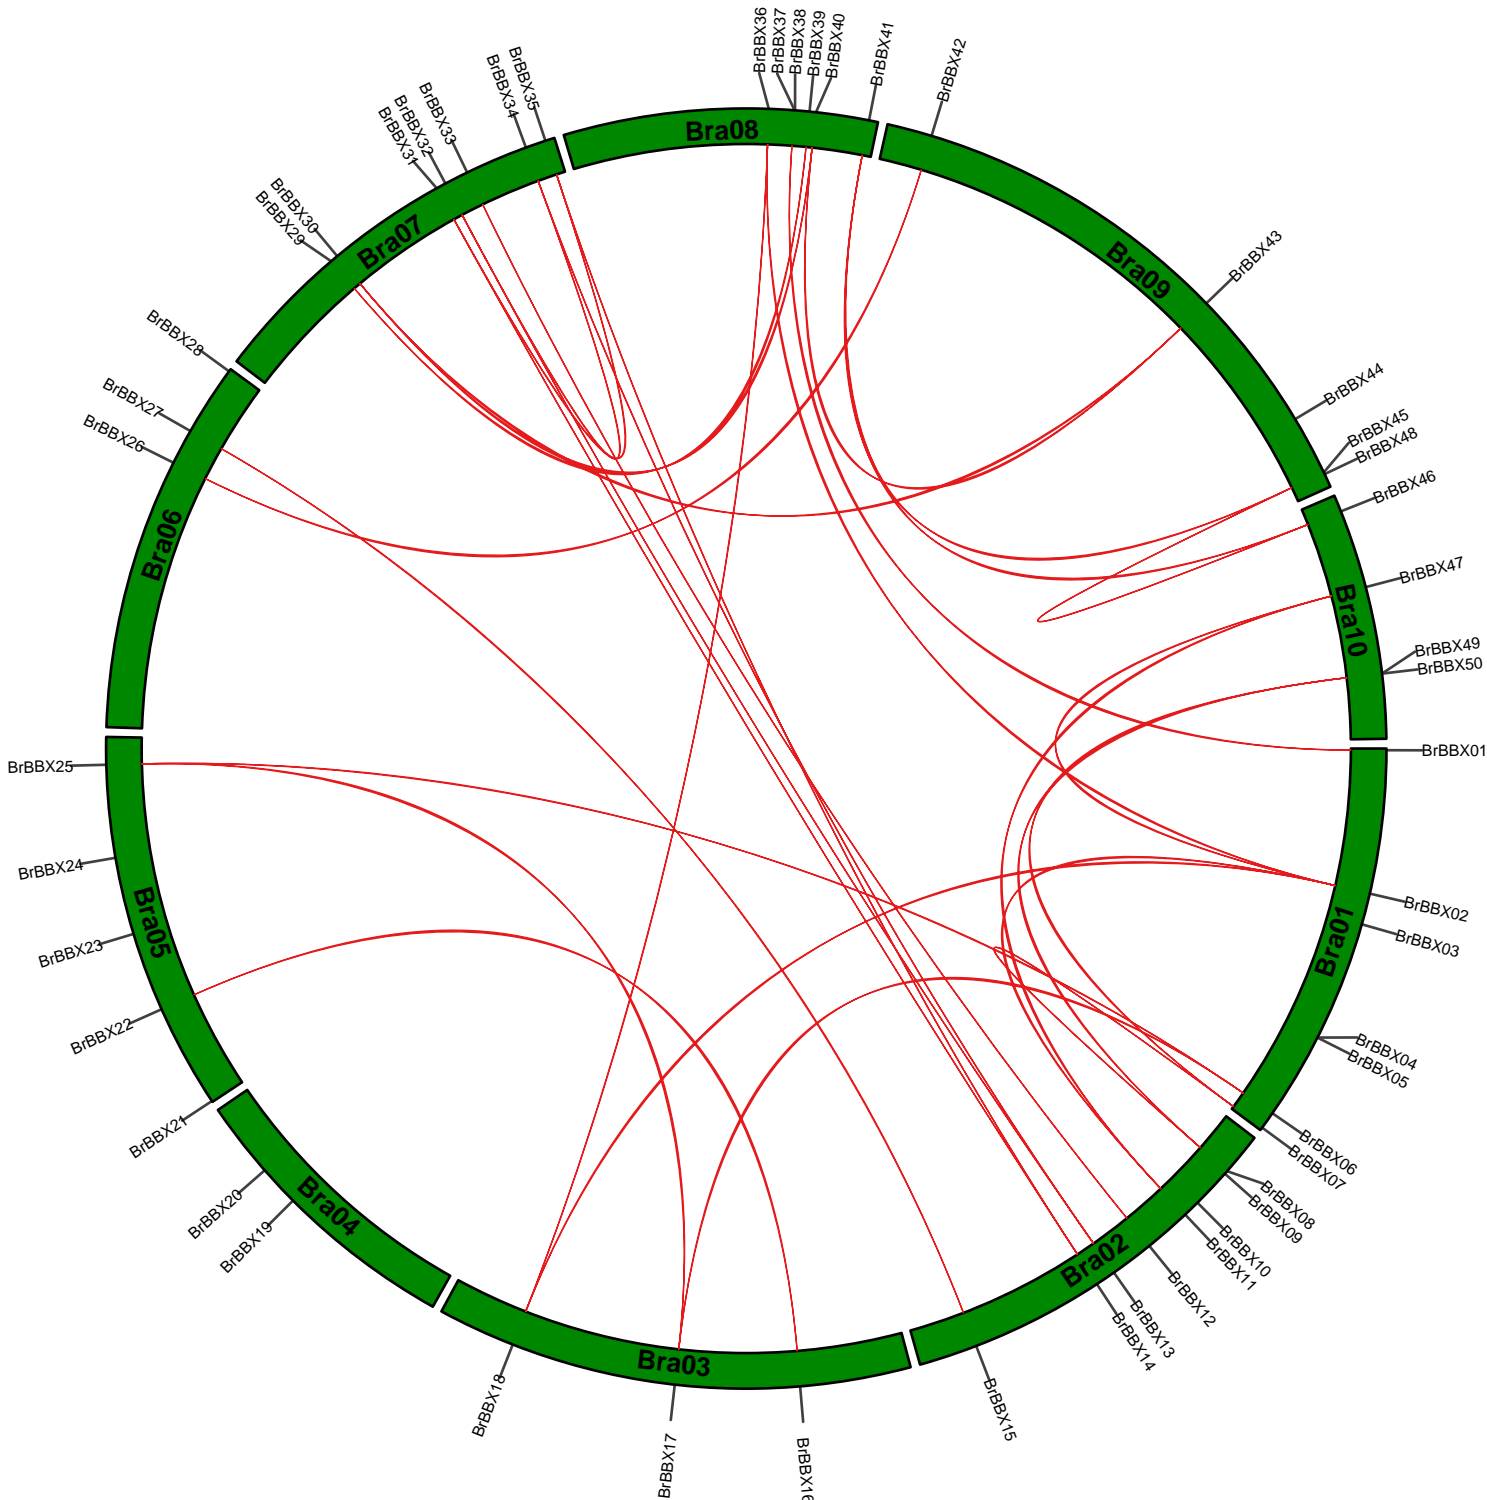

Supplement: s1 [file s1]

a

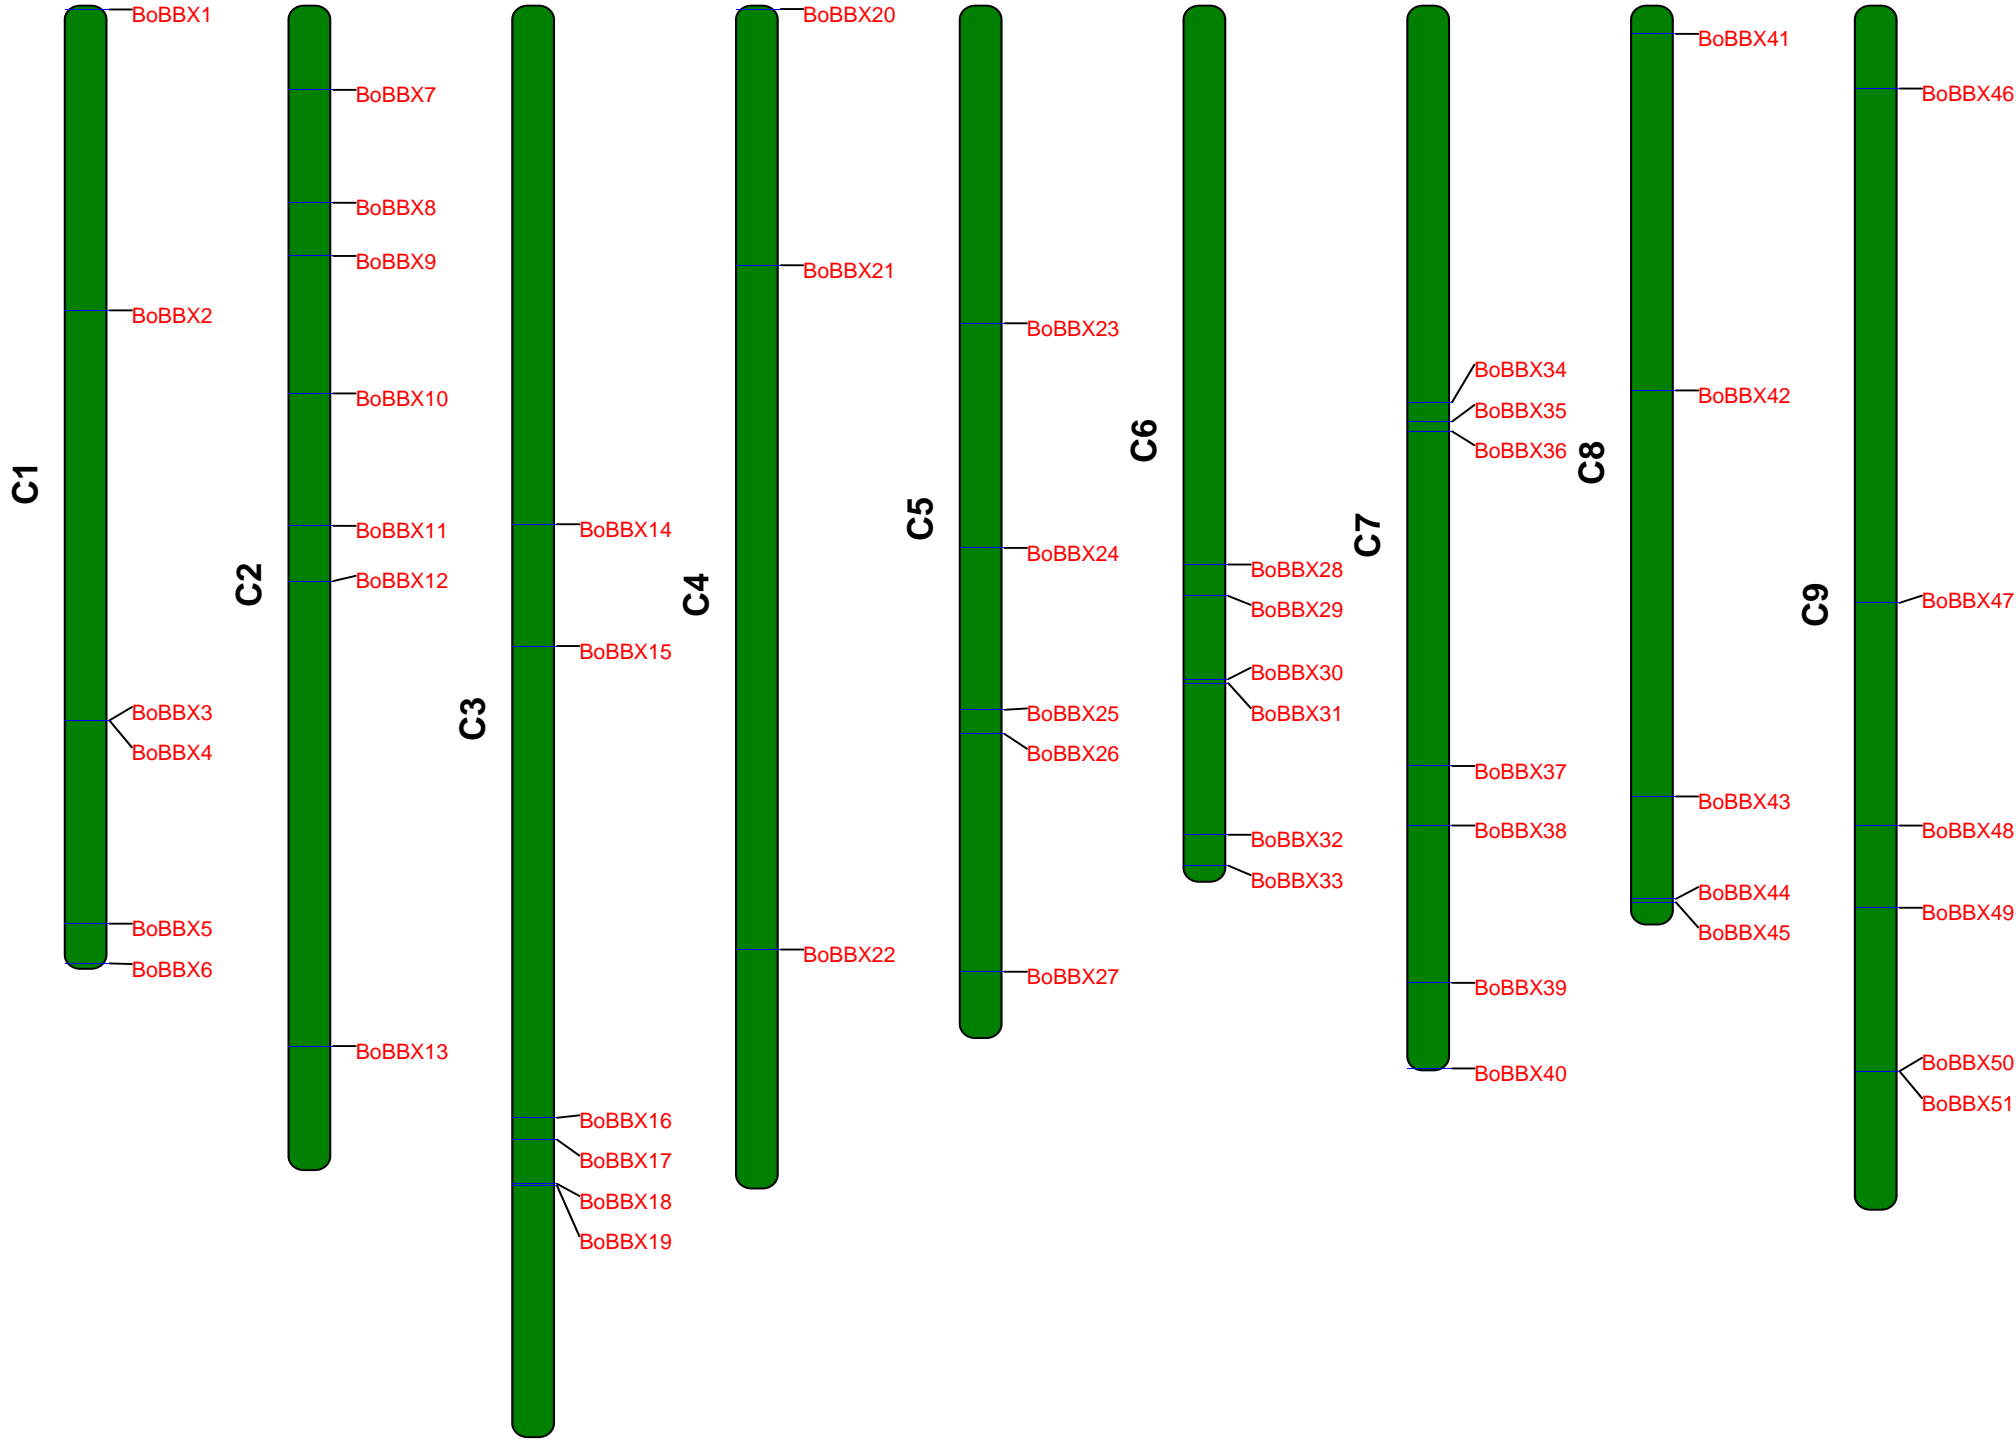

b

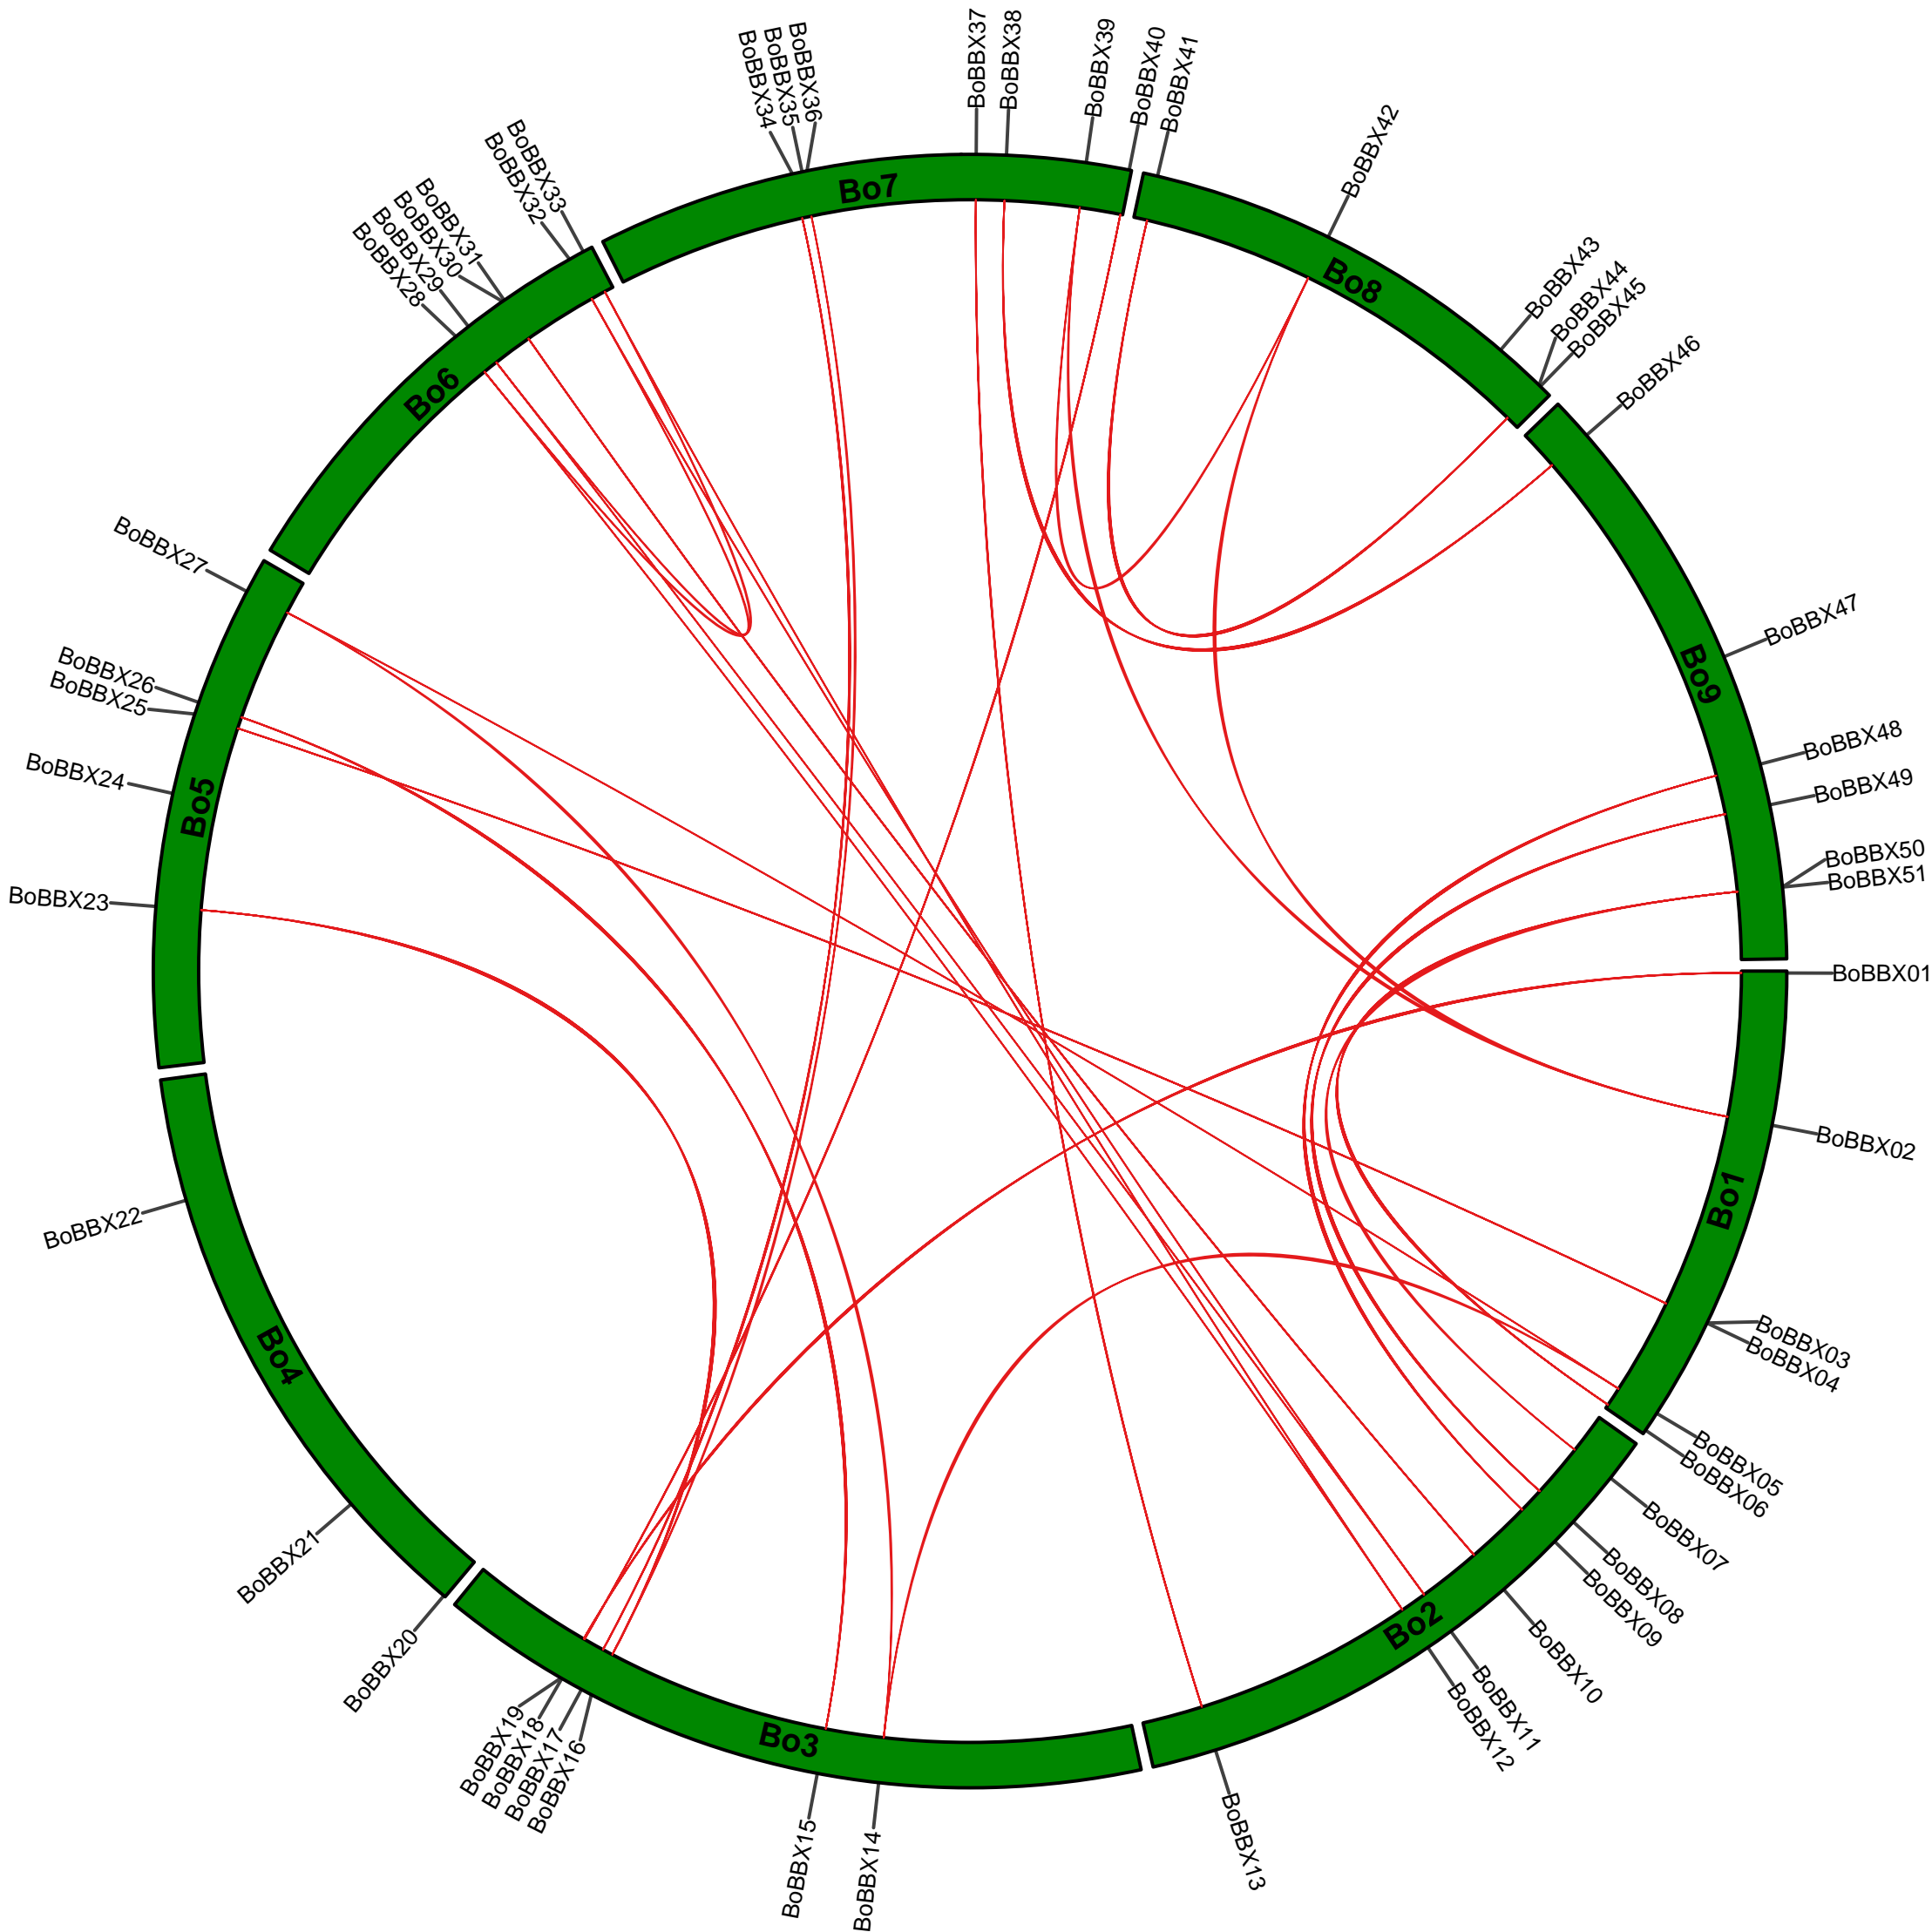

Supplement: s1 [file s1]

a

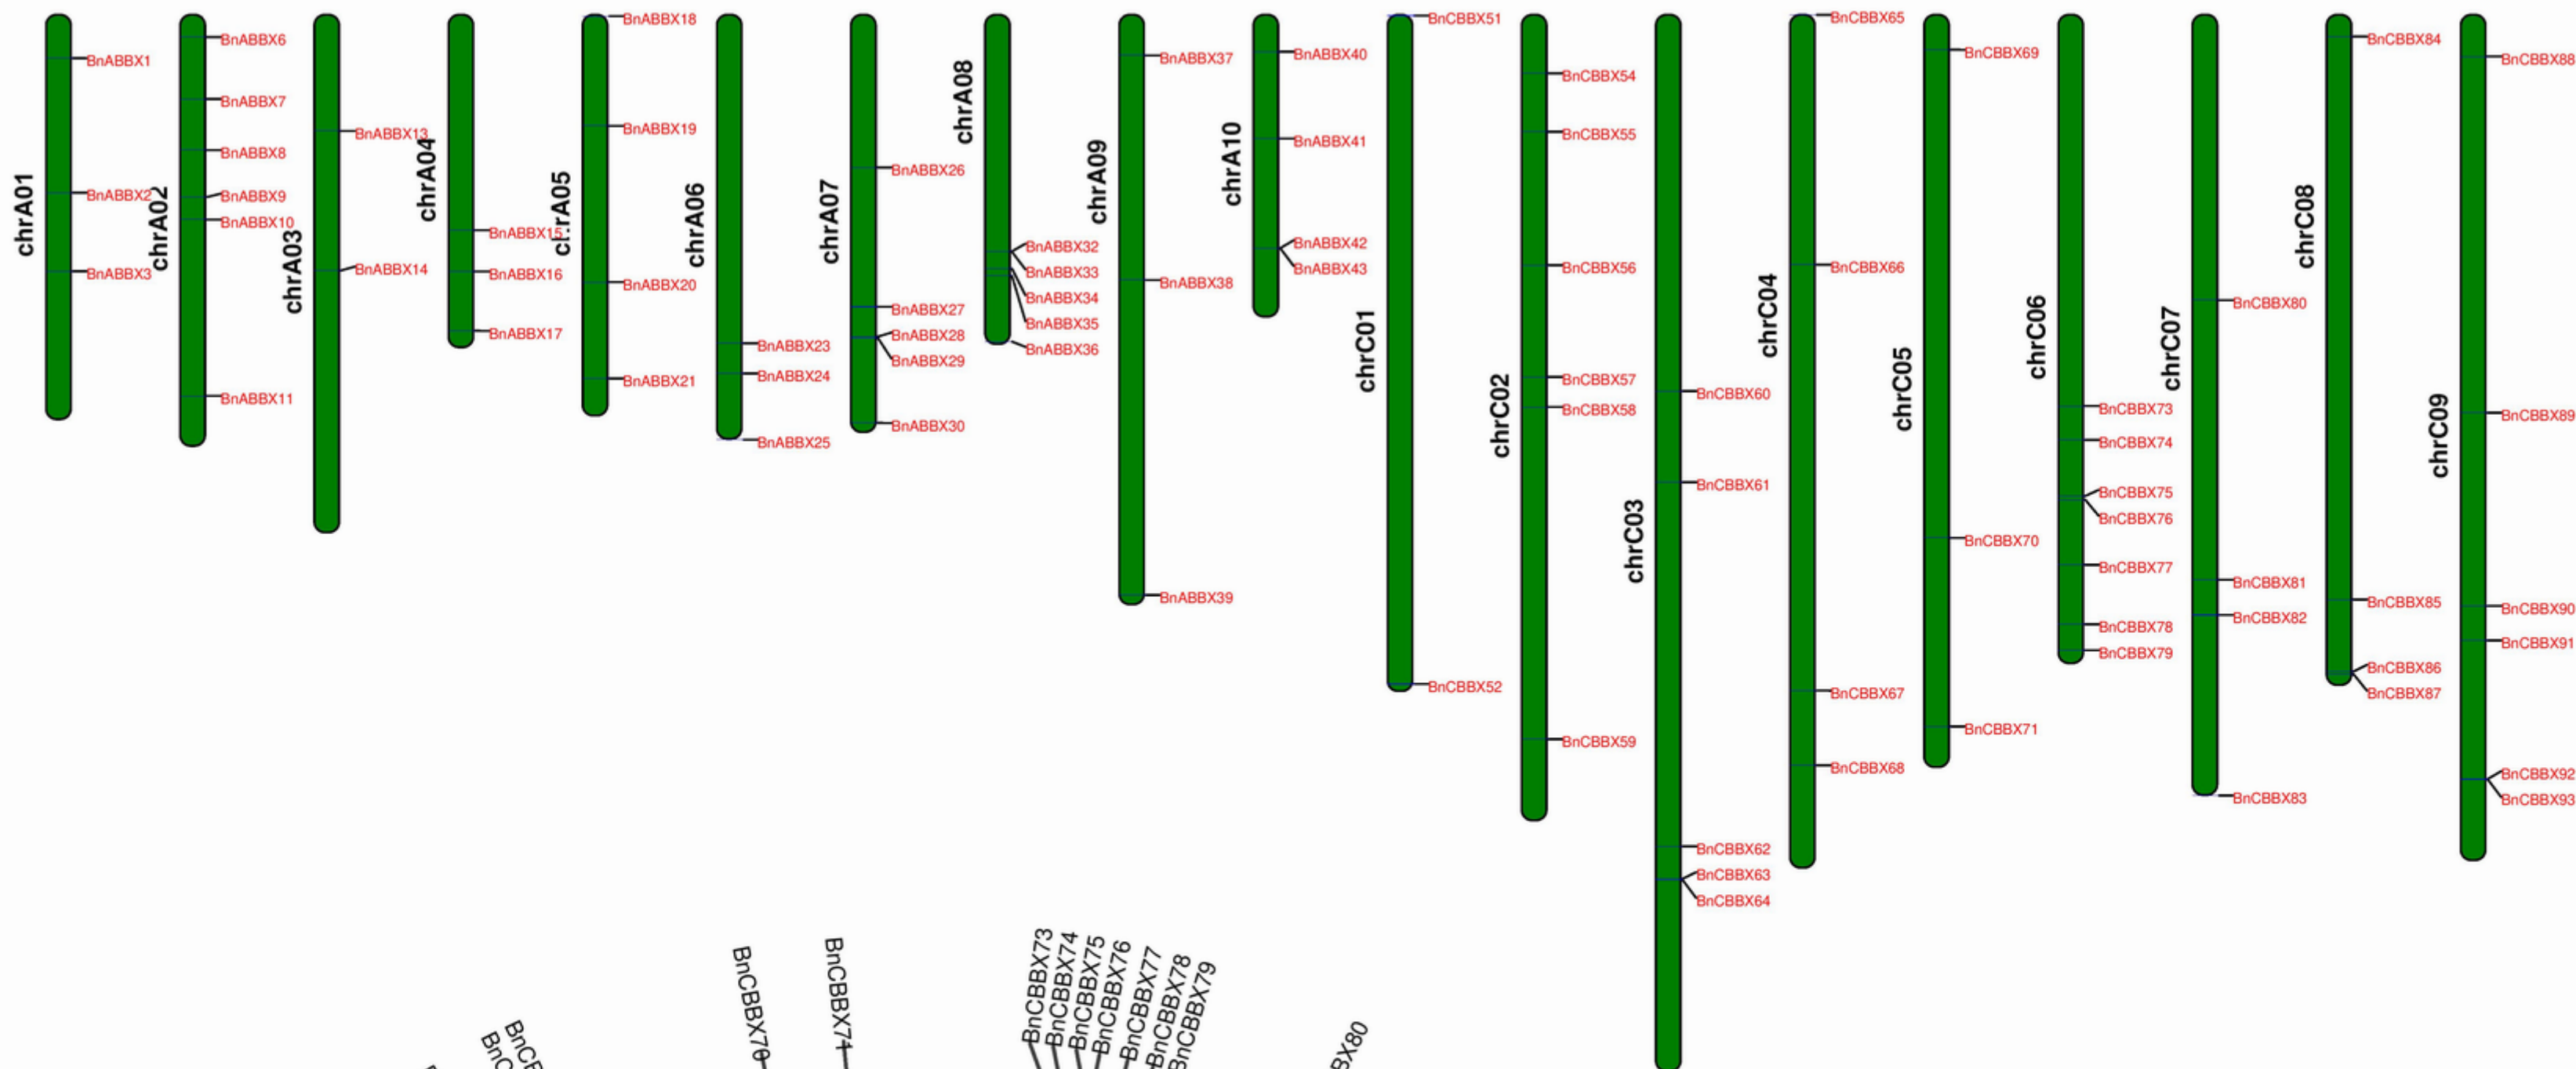

b

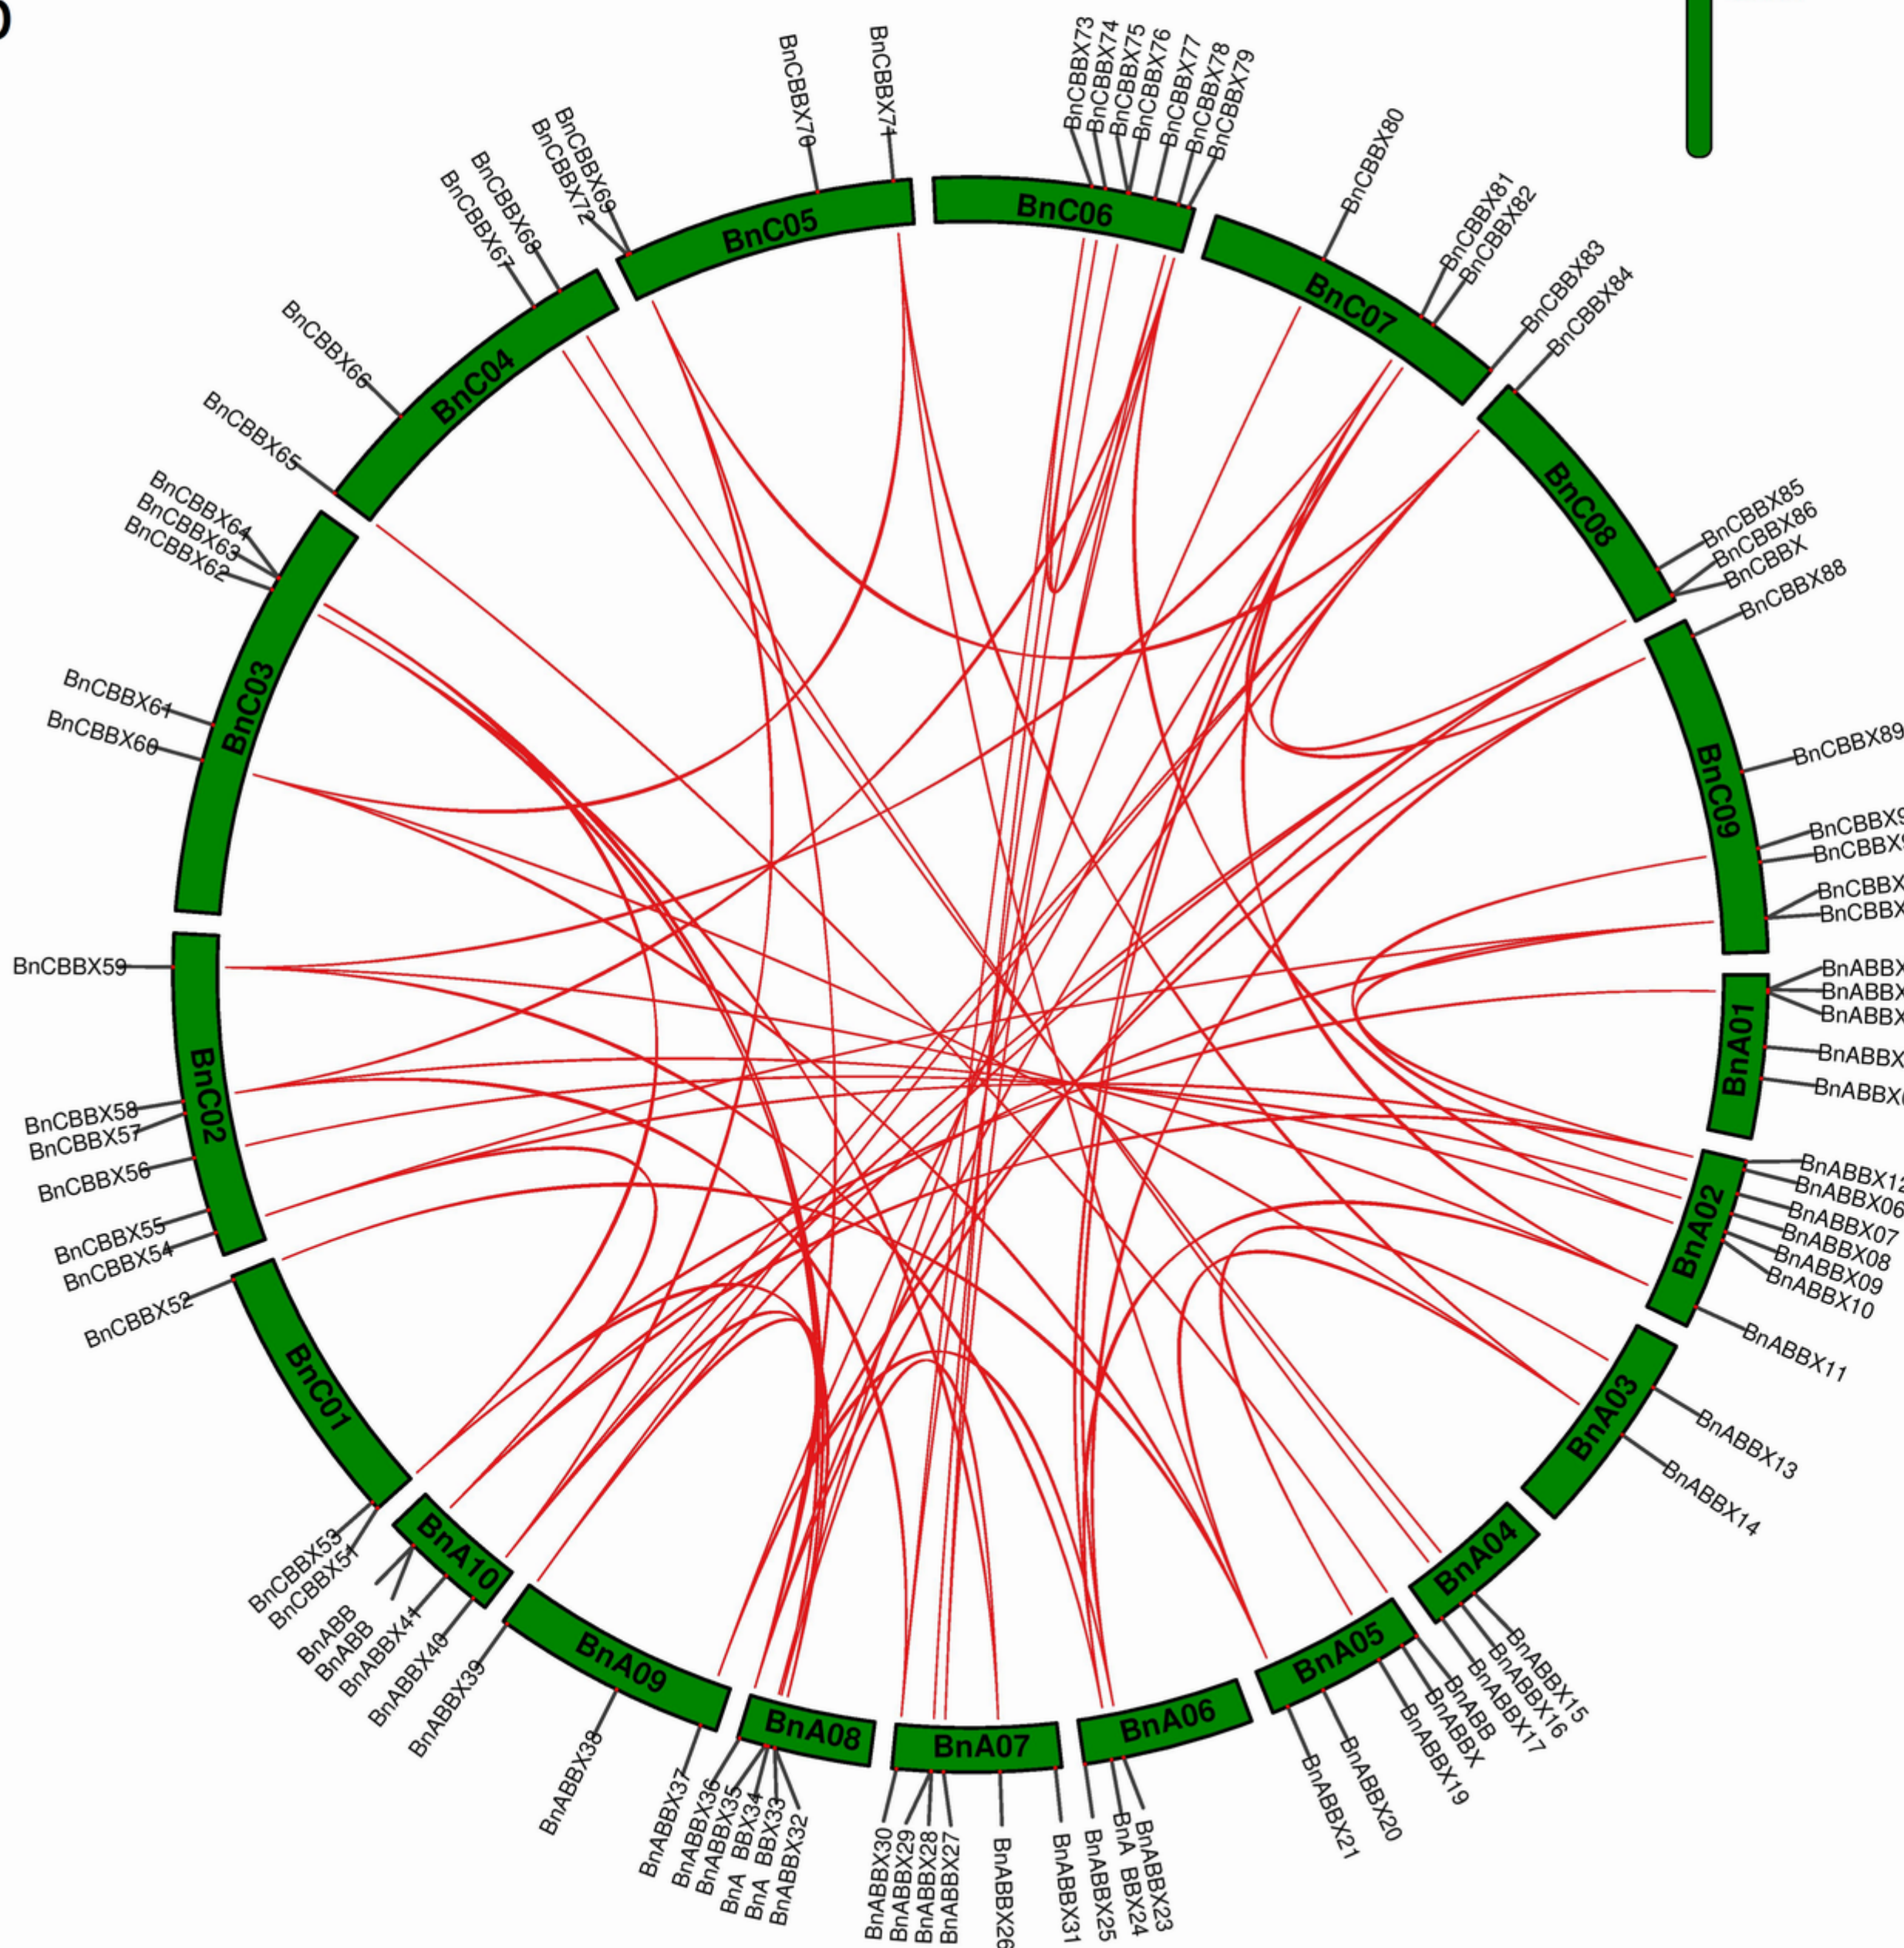

Supplement: s1 [file s1]
